# Supplementary material
Source: ML conference proceedings conference paper supplement (https://openreview.net/forum?id=bUJt8lifOT)

ERA5 + CAMS

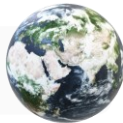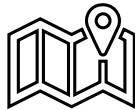

Tokenization and Aggregation

Weather + Air Quality  
Variables

Regional Cropping (MENA)

Random  
*leadtime*

Position

Weather  
Decoder

Air quality  
Decoder

ViT  
Encoder

Dual prediction head

$\mathcal{L}_f$

Cross  
Attention

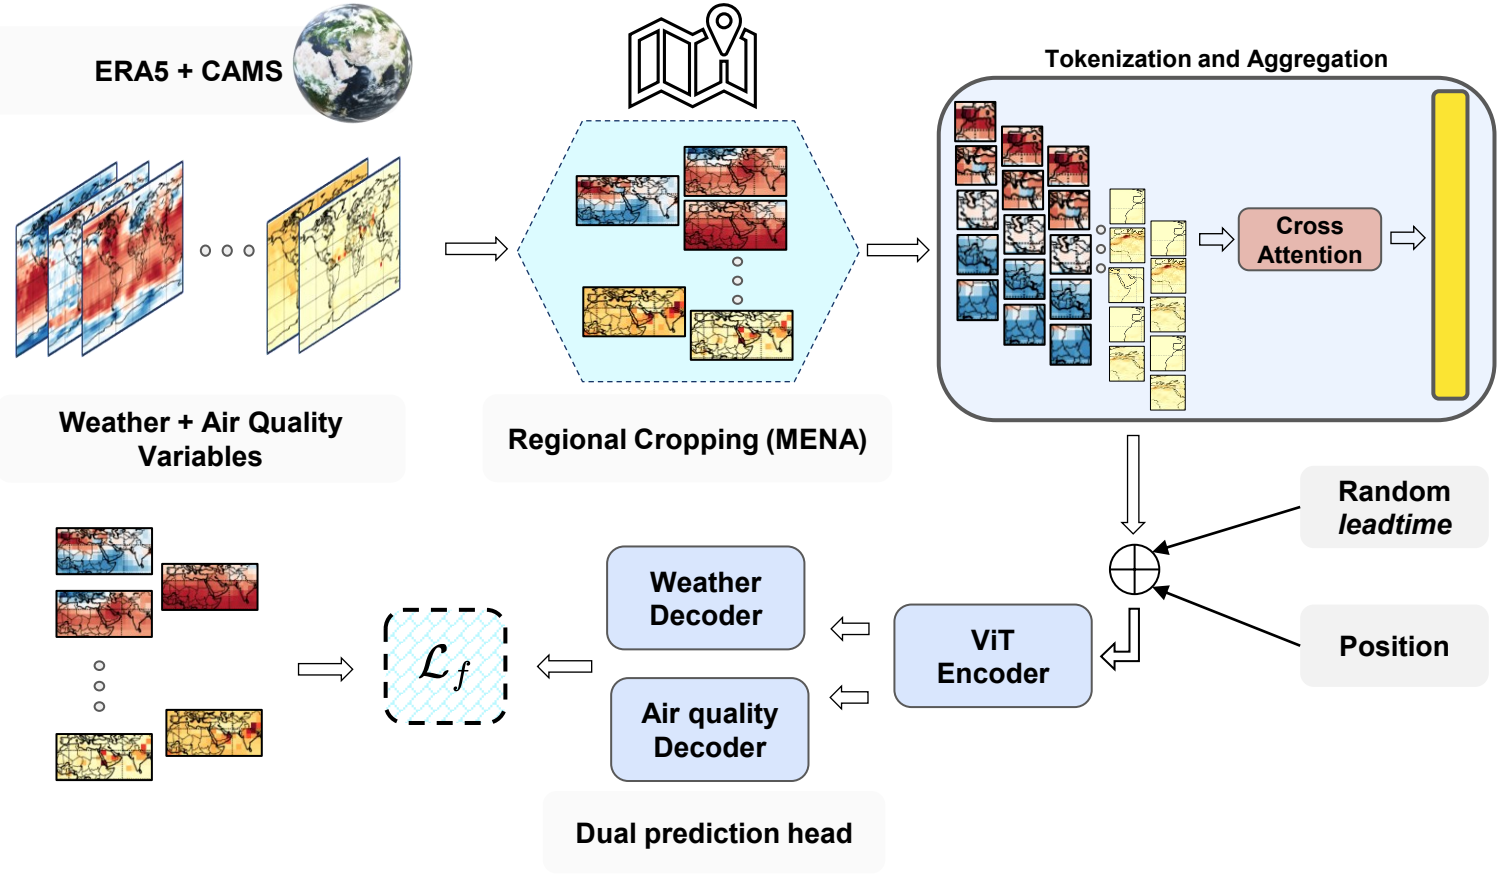

Supplement: supplementary_material [file attachment]
