# Supplementary material
Source: ML conference proceedings conference paper supplement (https://openreview.net/forum?id=bUJt8lifOT)

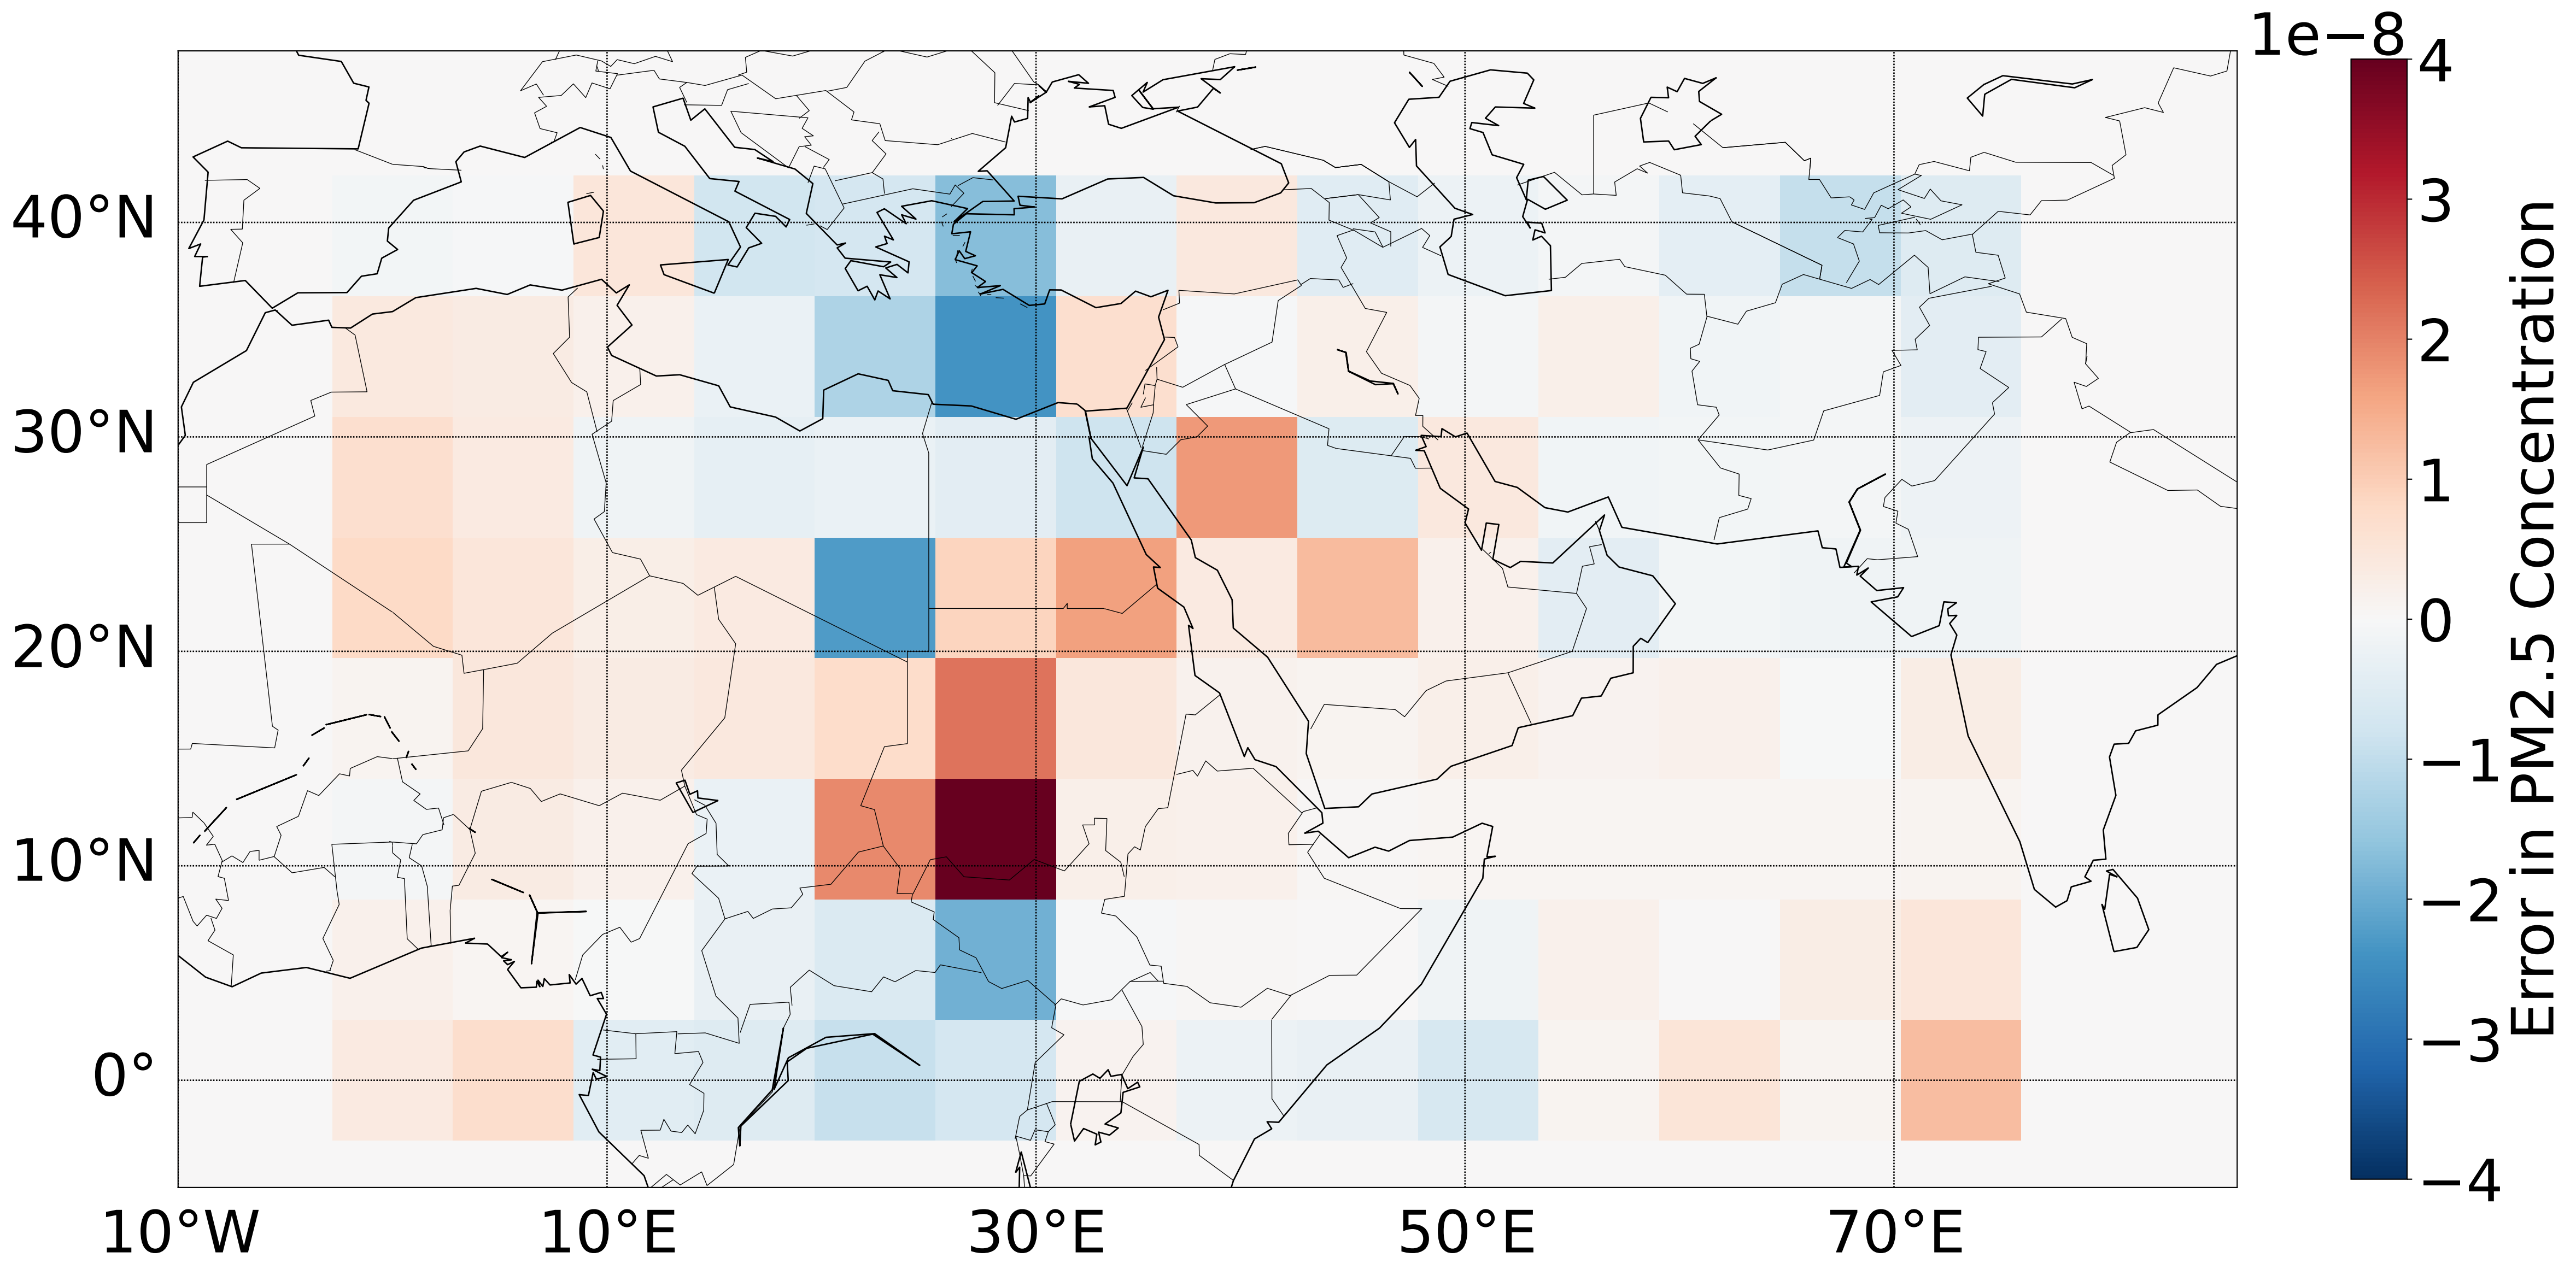

Supplement: supplementary_material [file attachment]

# pm1 distribution

max freq: 158393347

Clipped frequency

200

150

100

50

0

0.0

0.2

0.4

0.6

0.8

1.0

1.2

1e-5

Concentration value

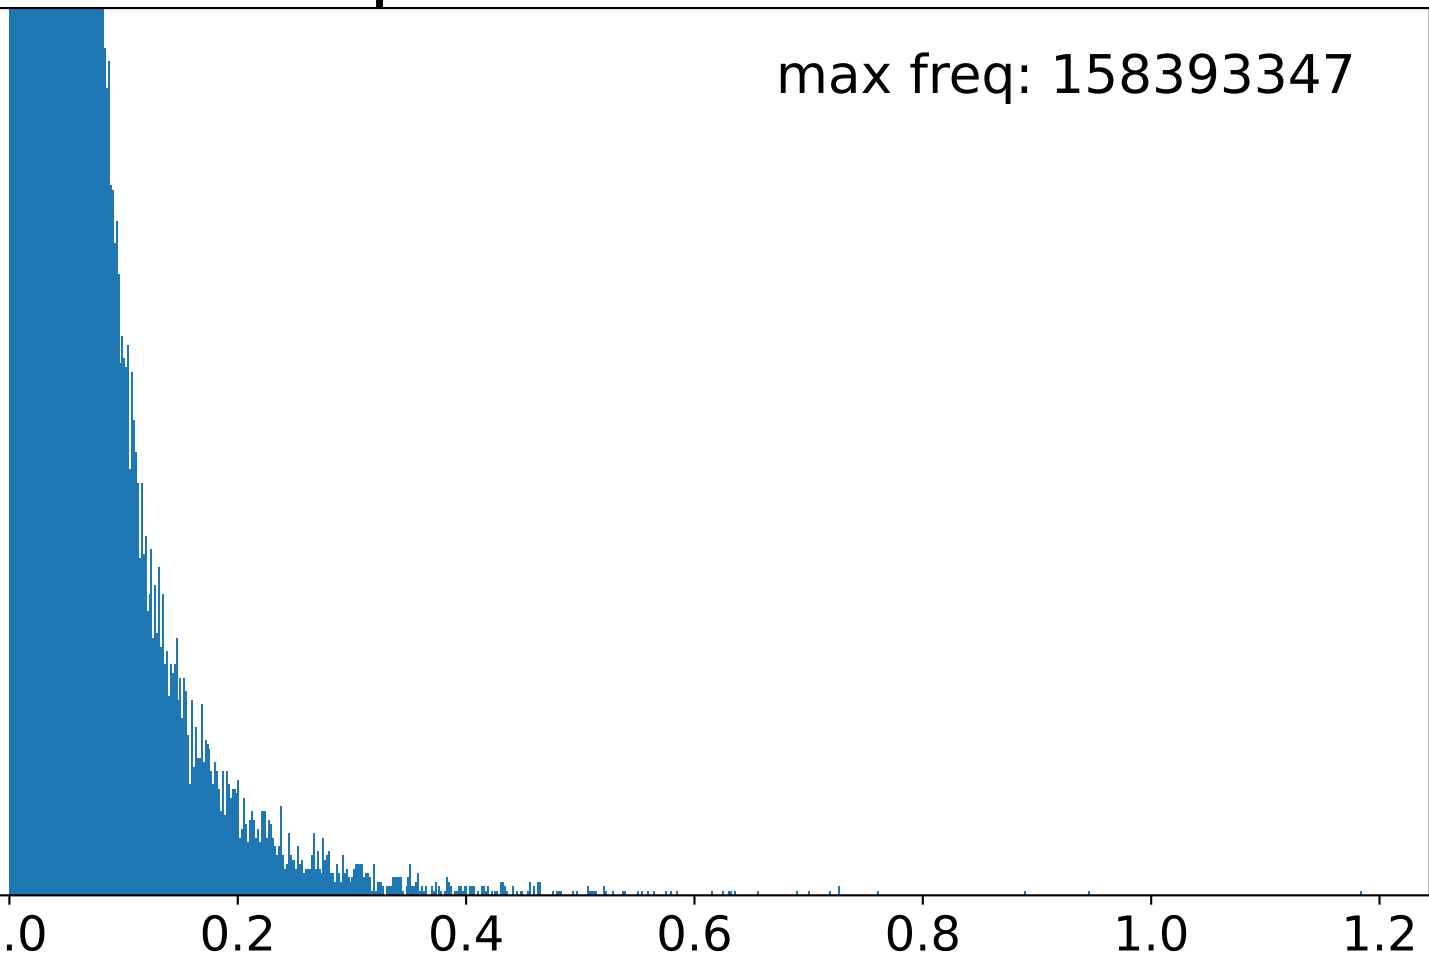

Supplement: supplementary_material [file attachment]

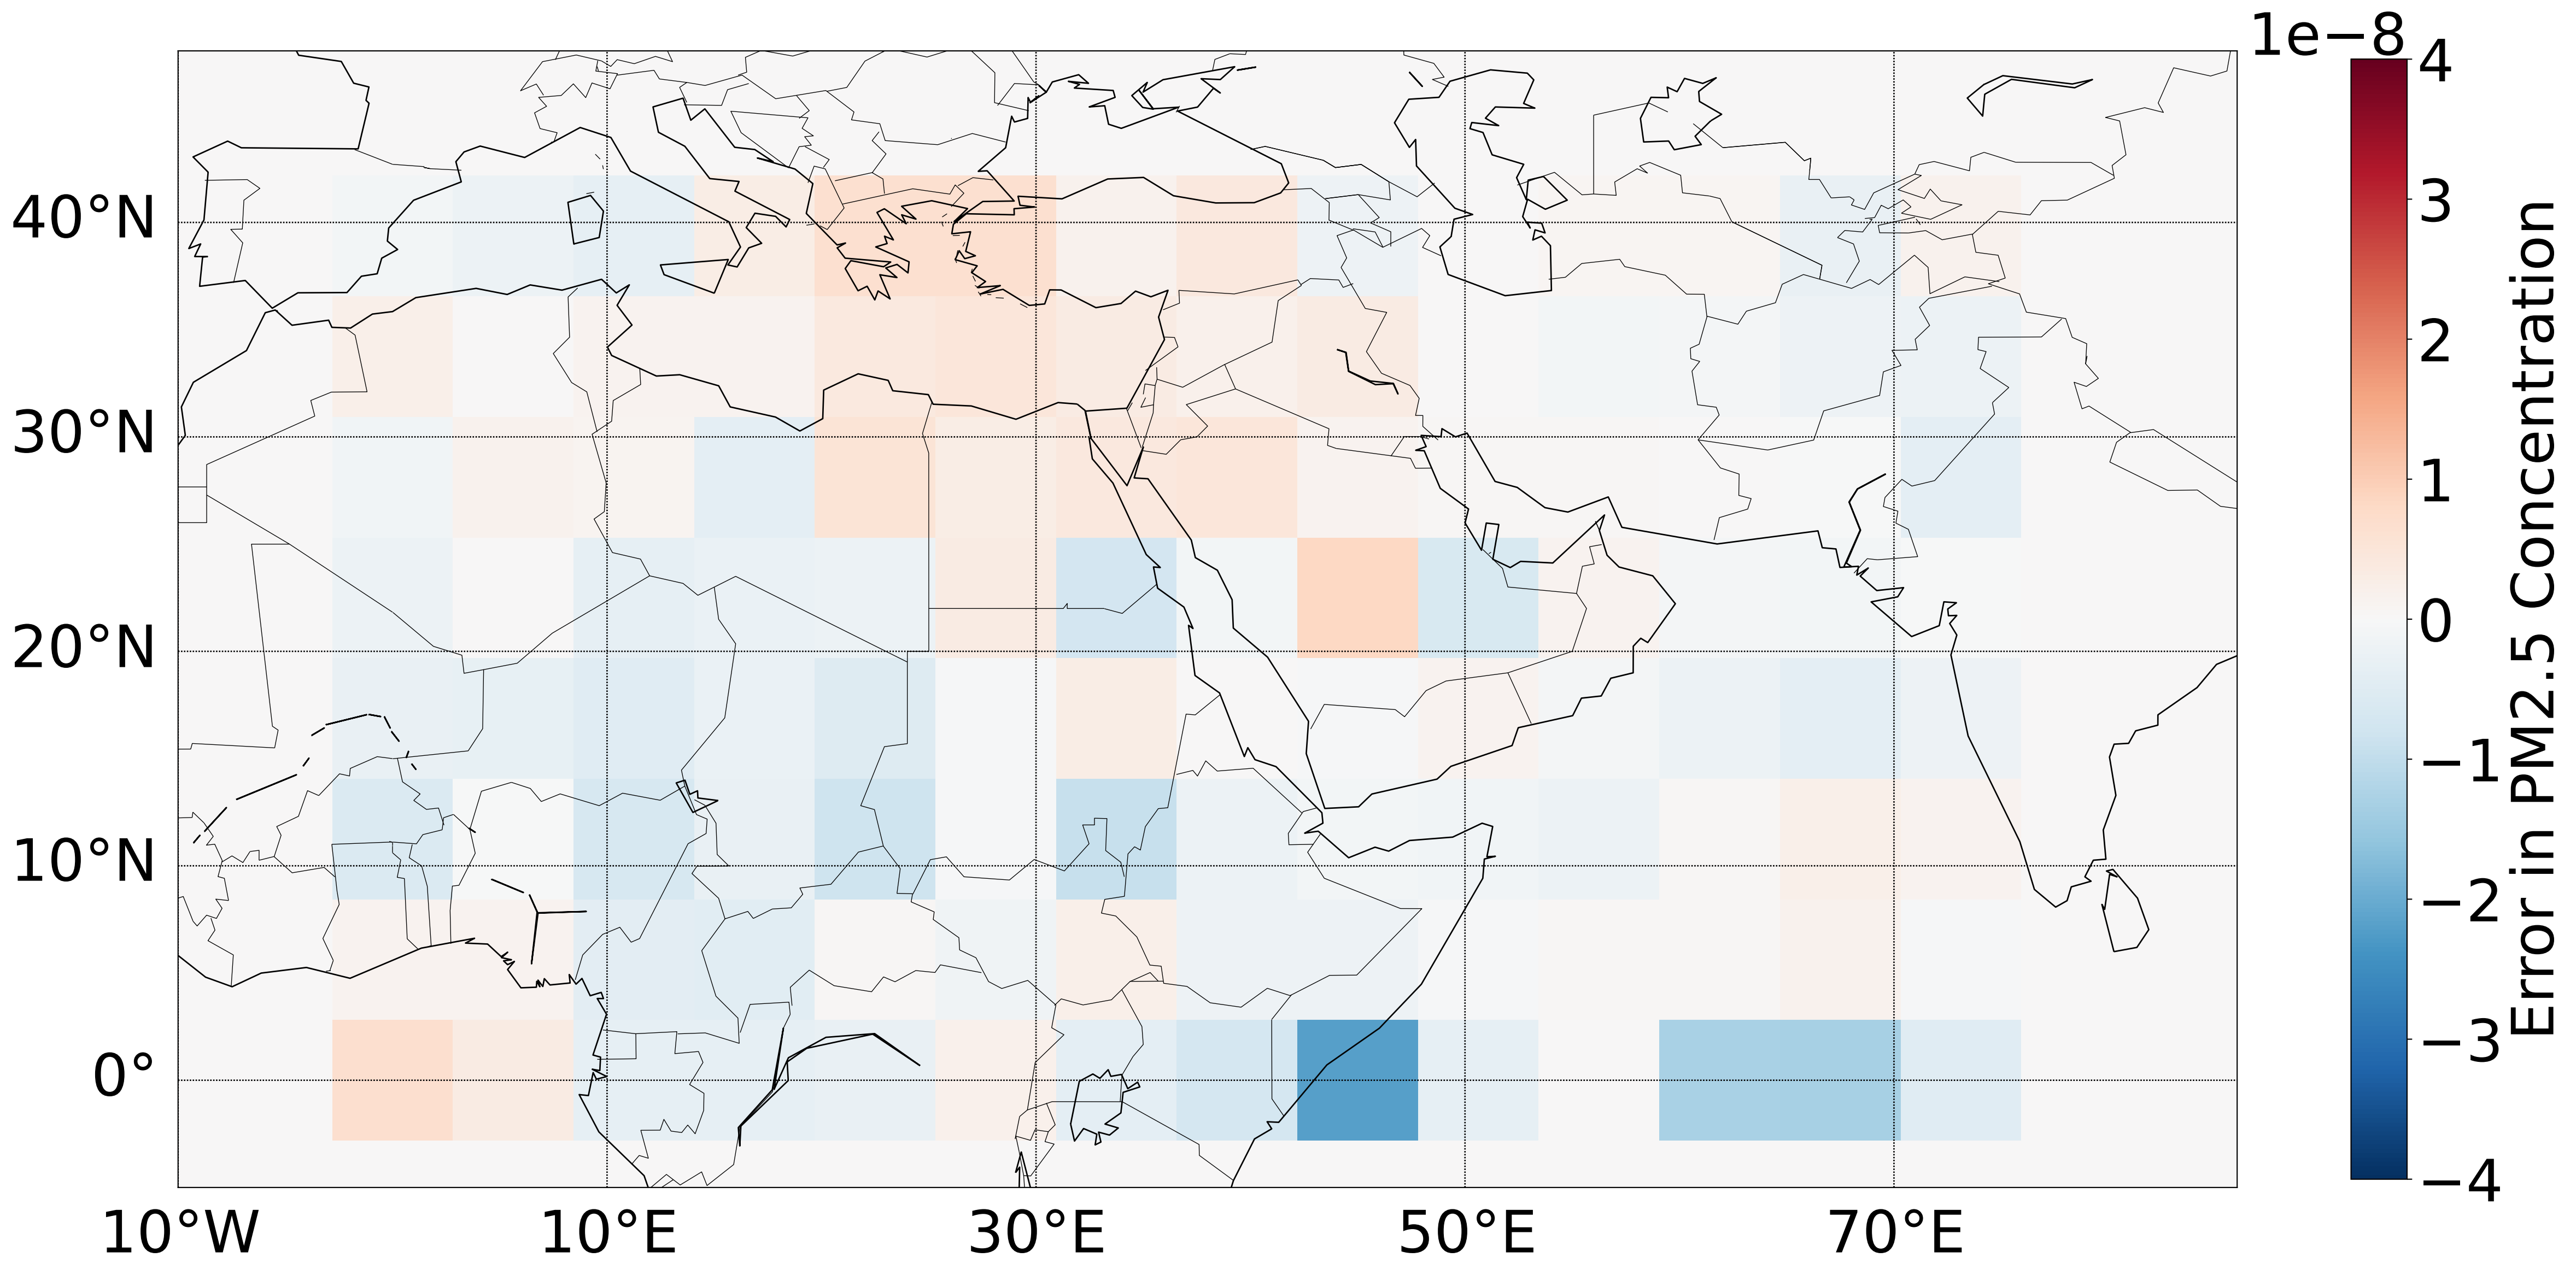

Supplement: supplementary_material [file attachment]

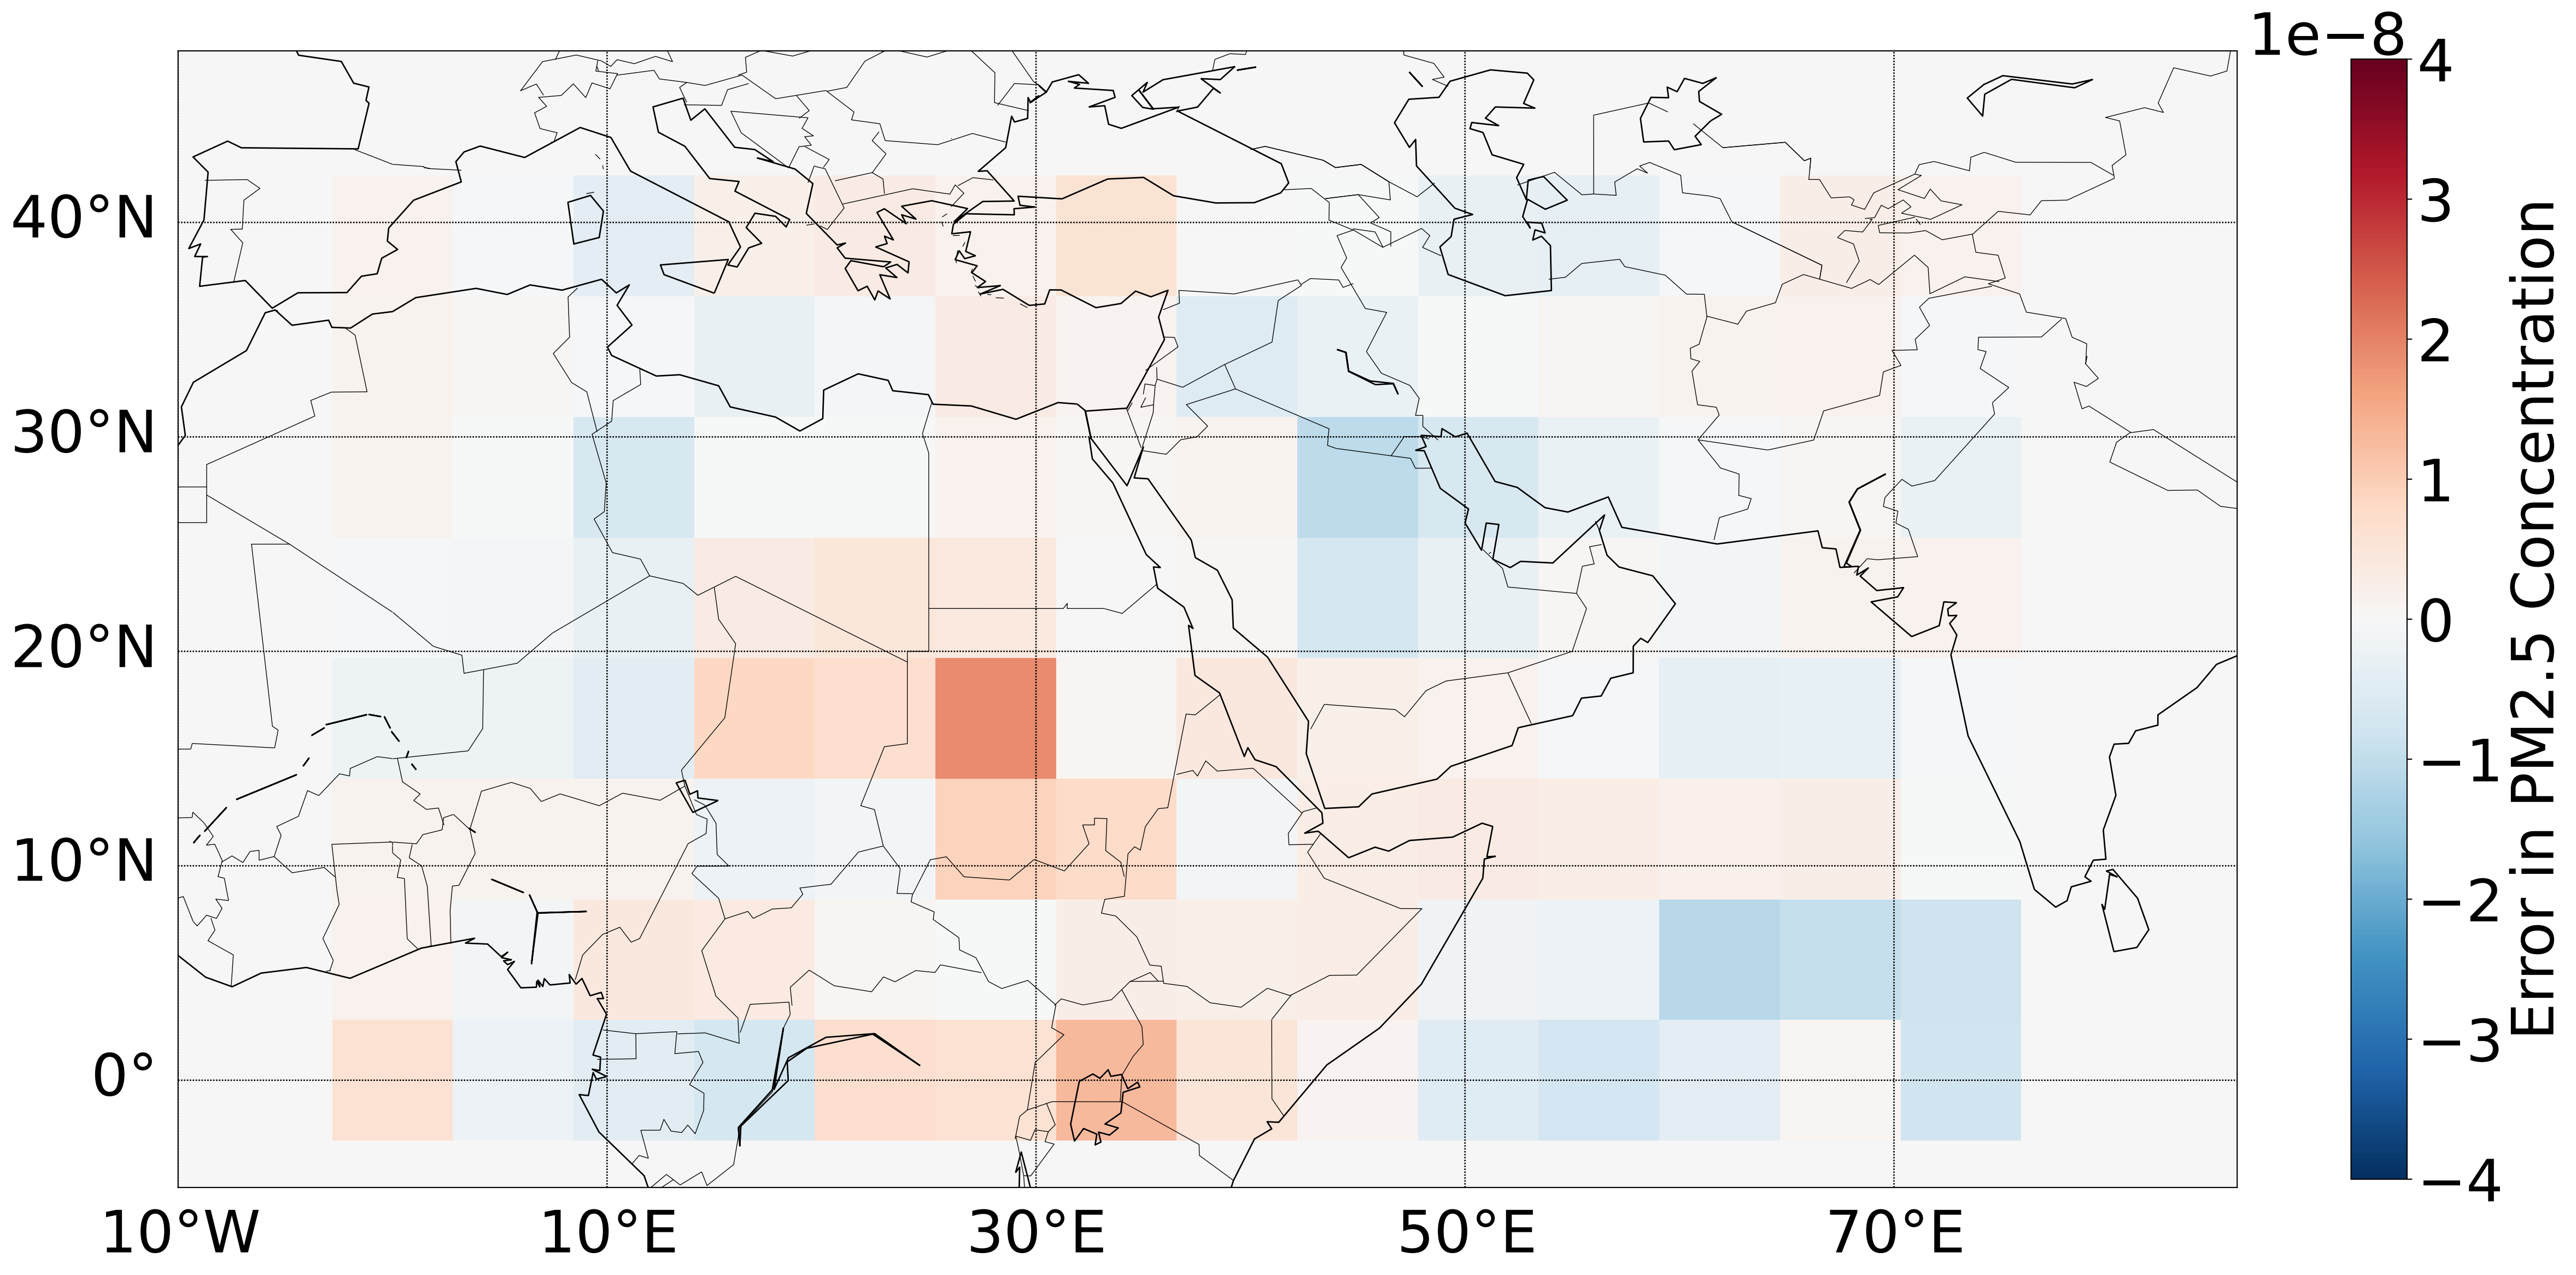

Supplement: supplementary_material [file attachment]

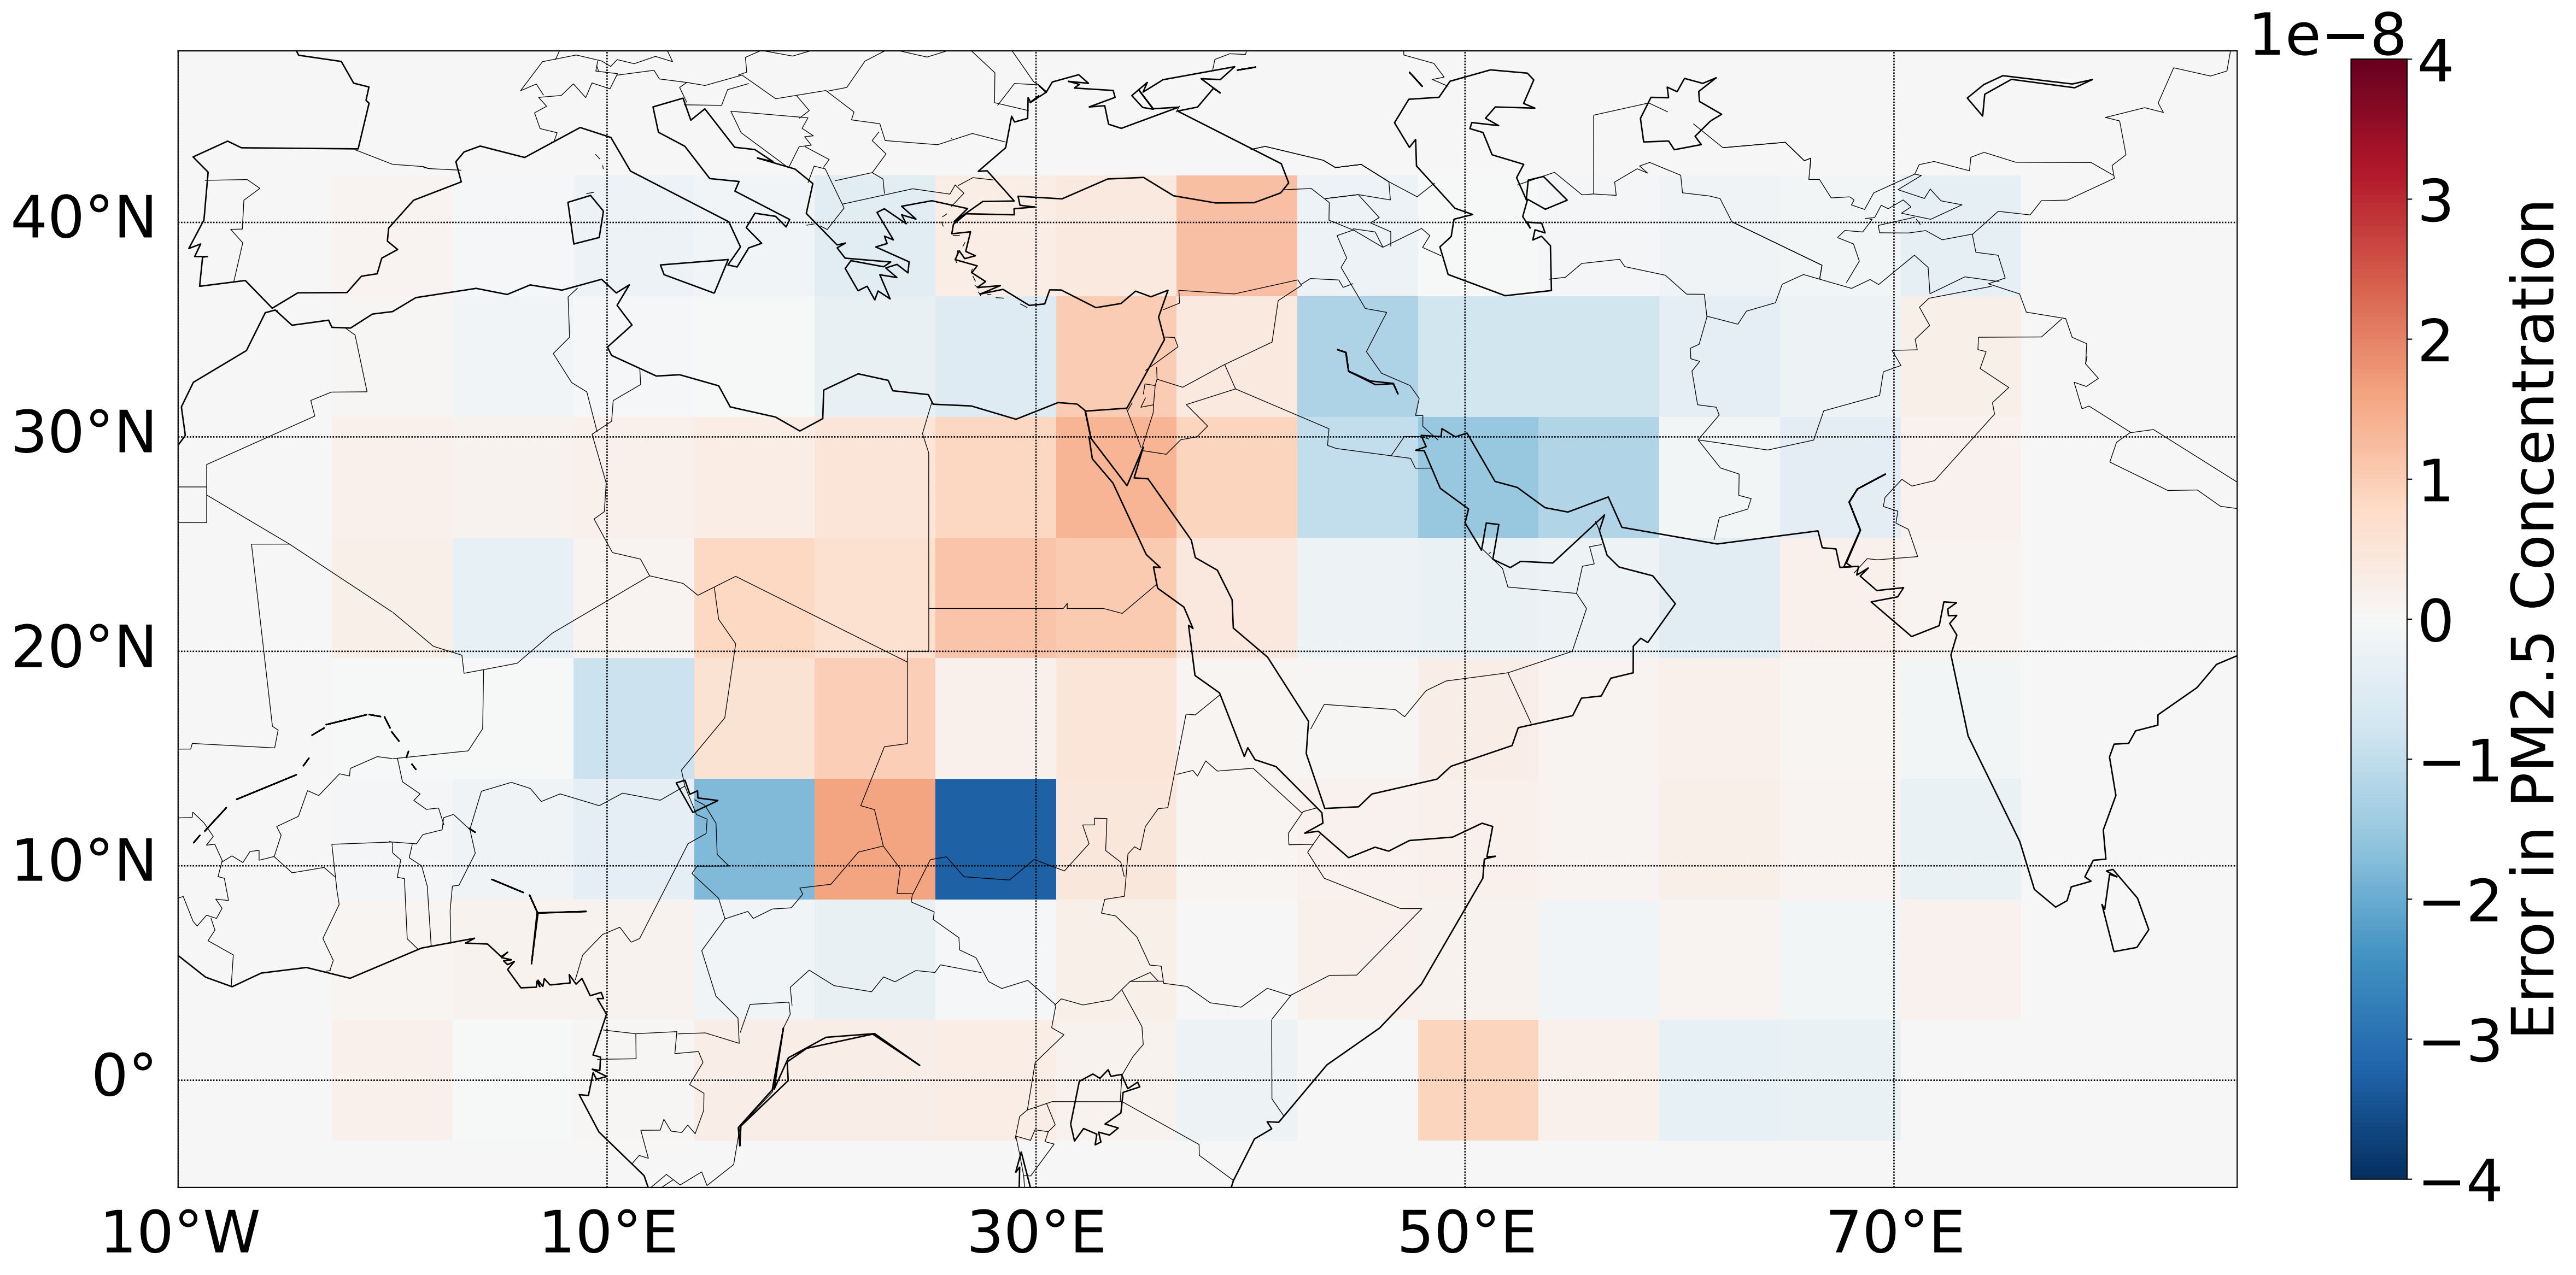

Supplement: supplementary_material [file attachment]

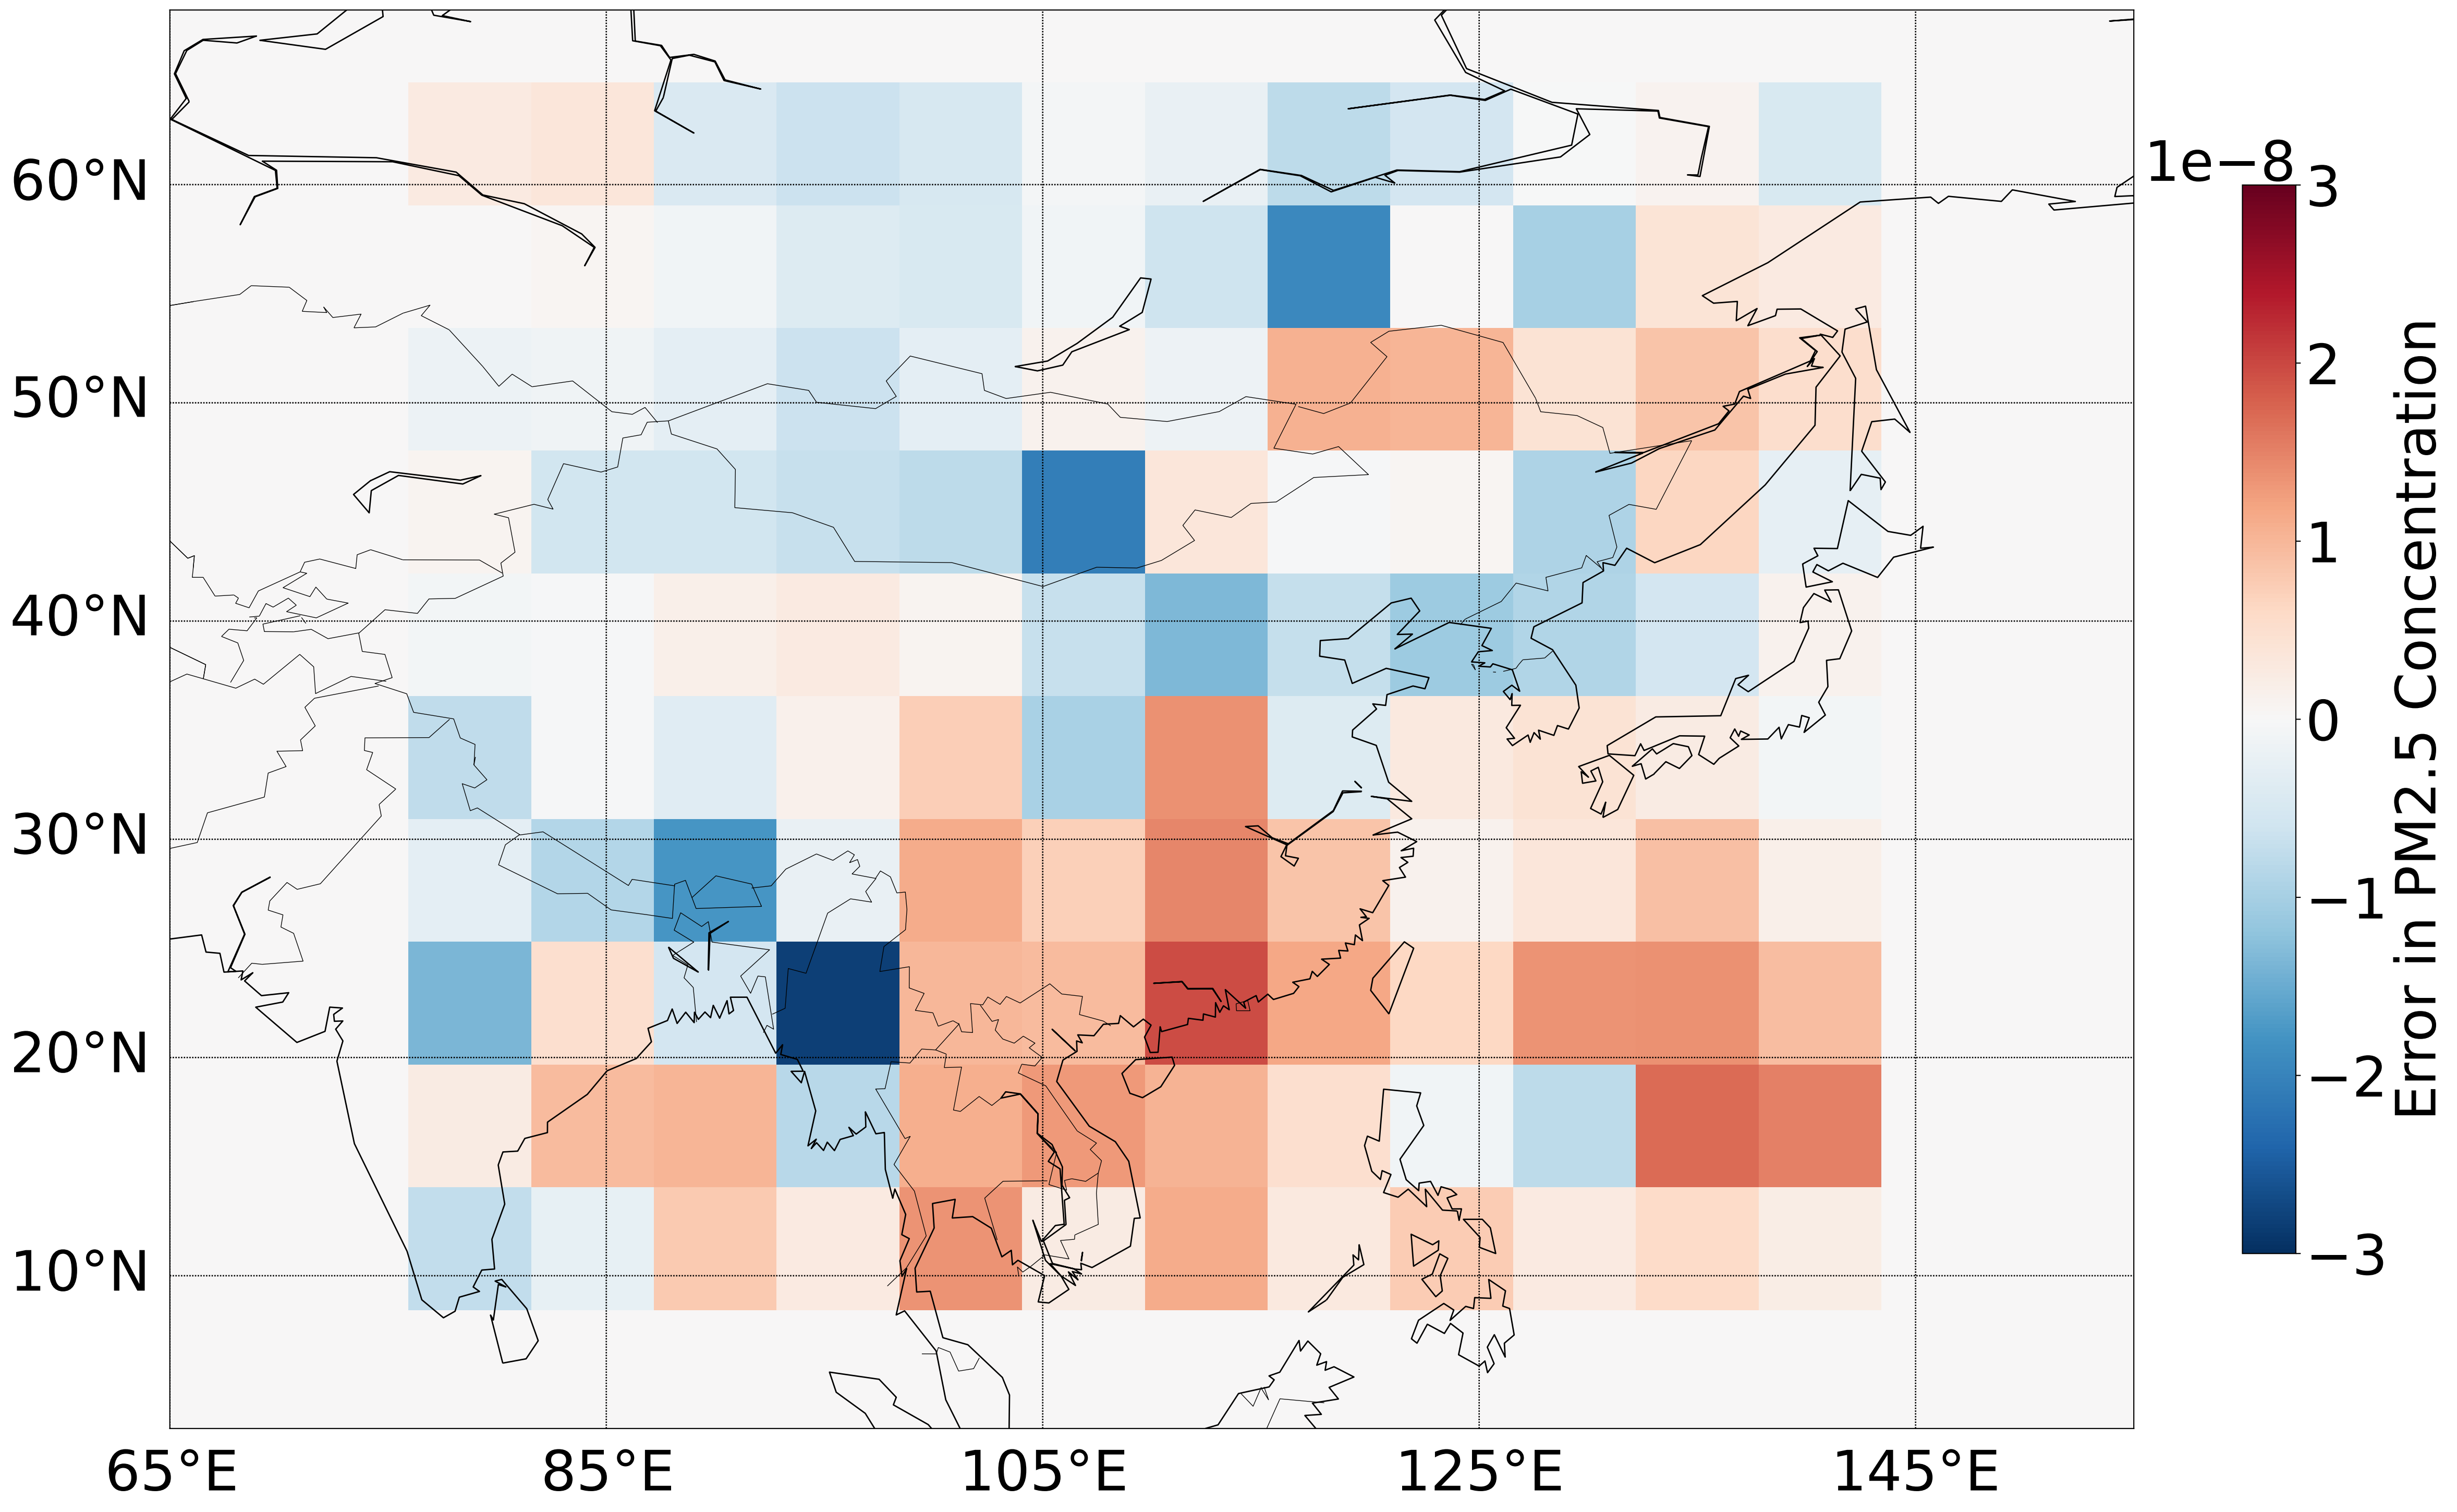

Supplement: supplementary_material [file attachment]

# pm2.5 distribution

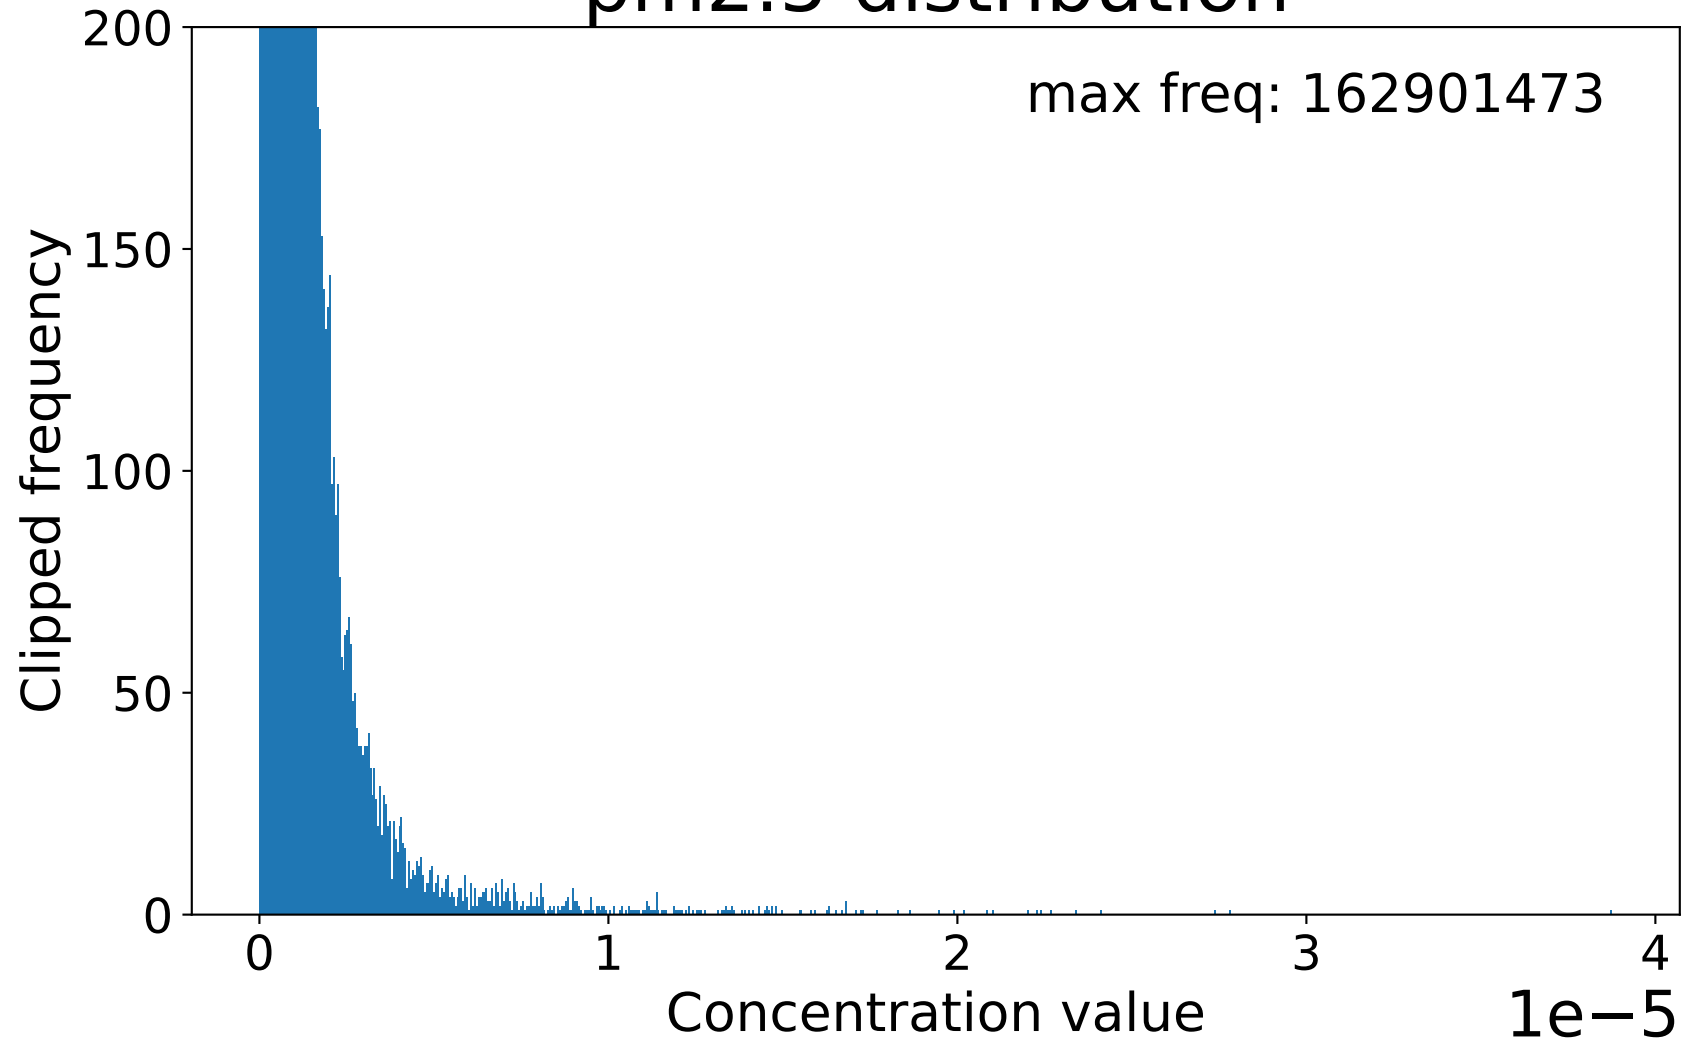

Supplement: supplementary_material [file attachment]

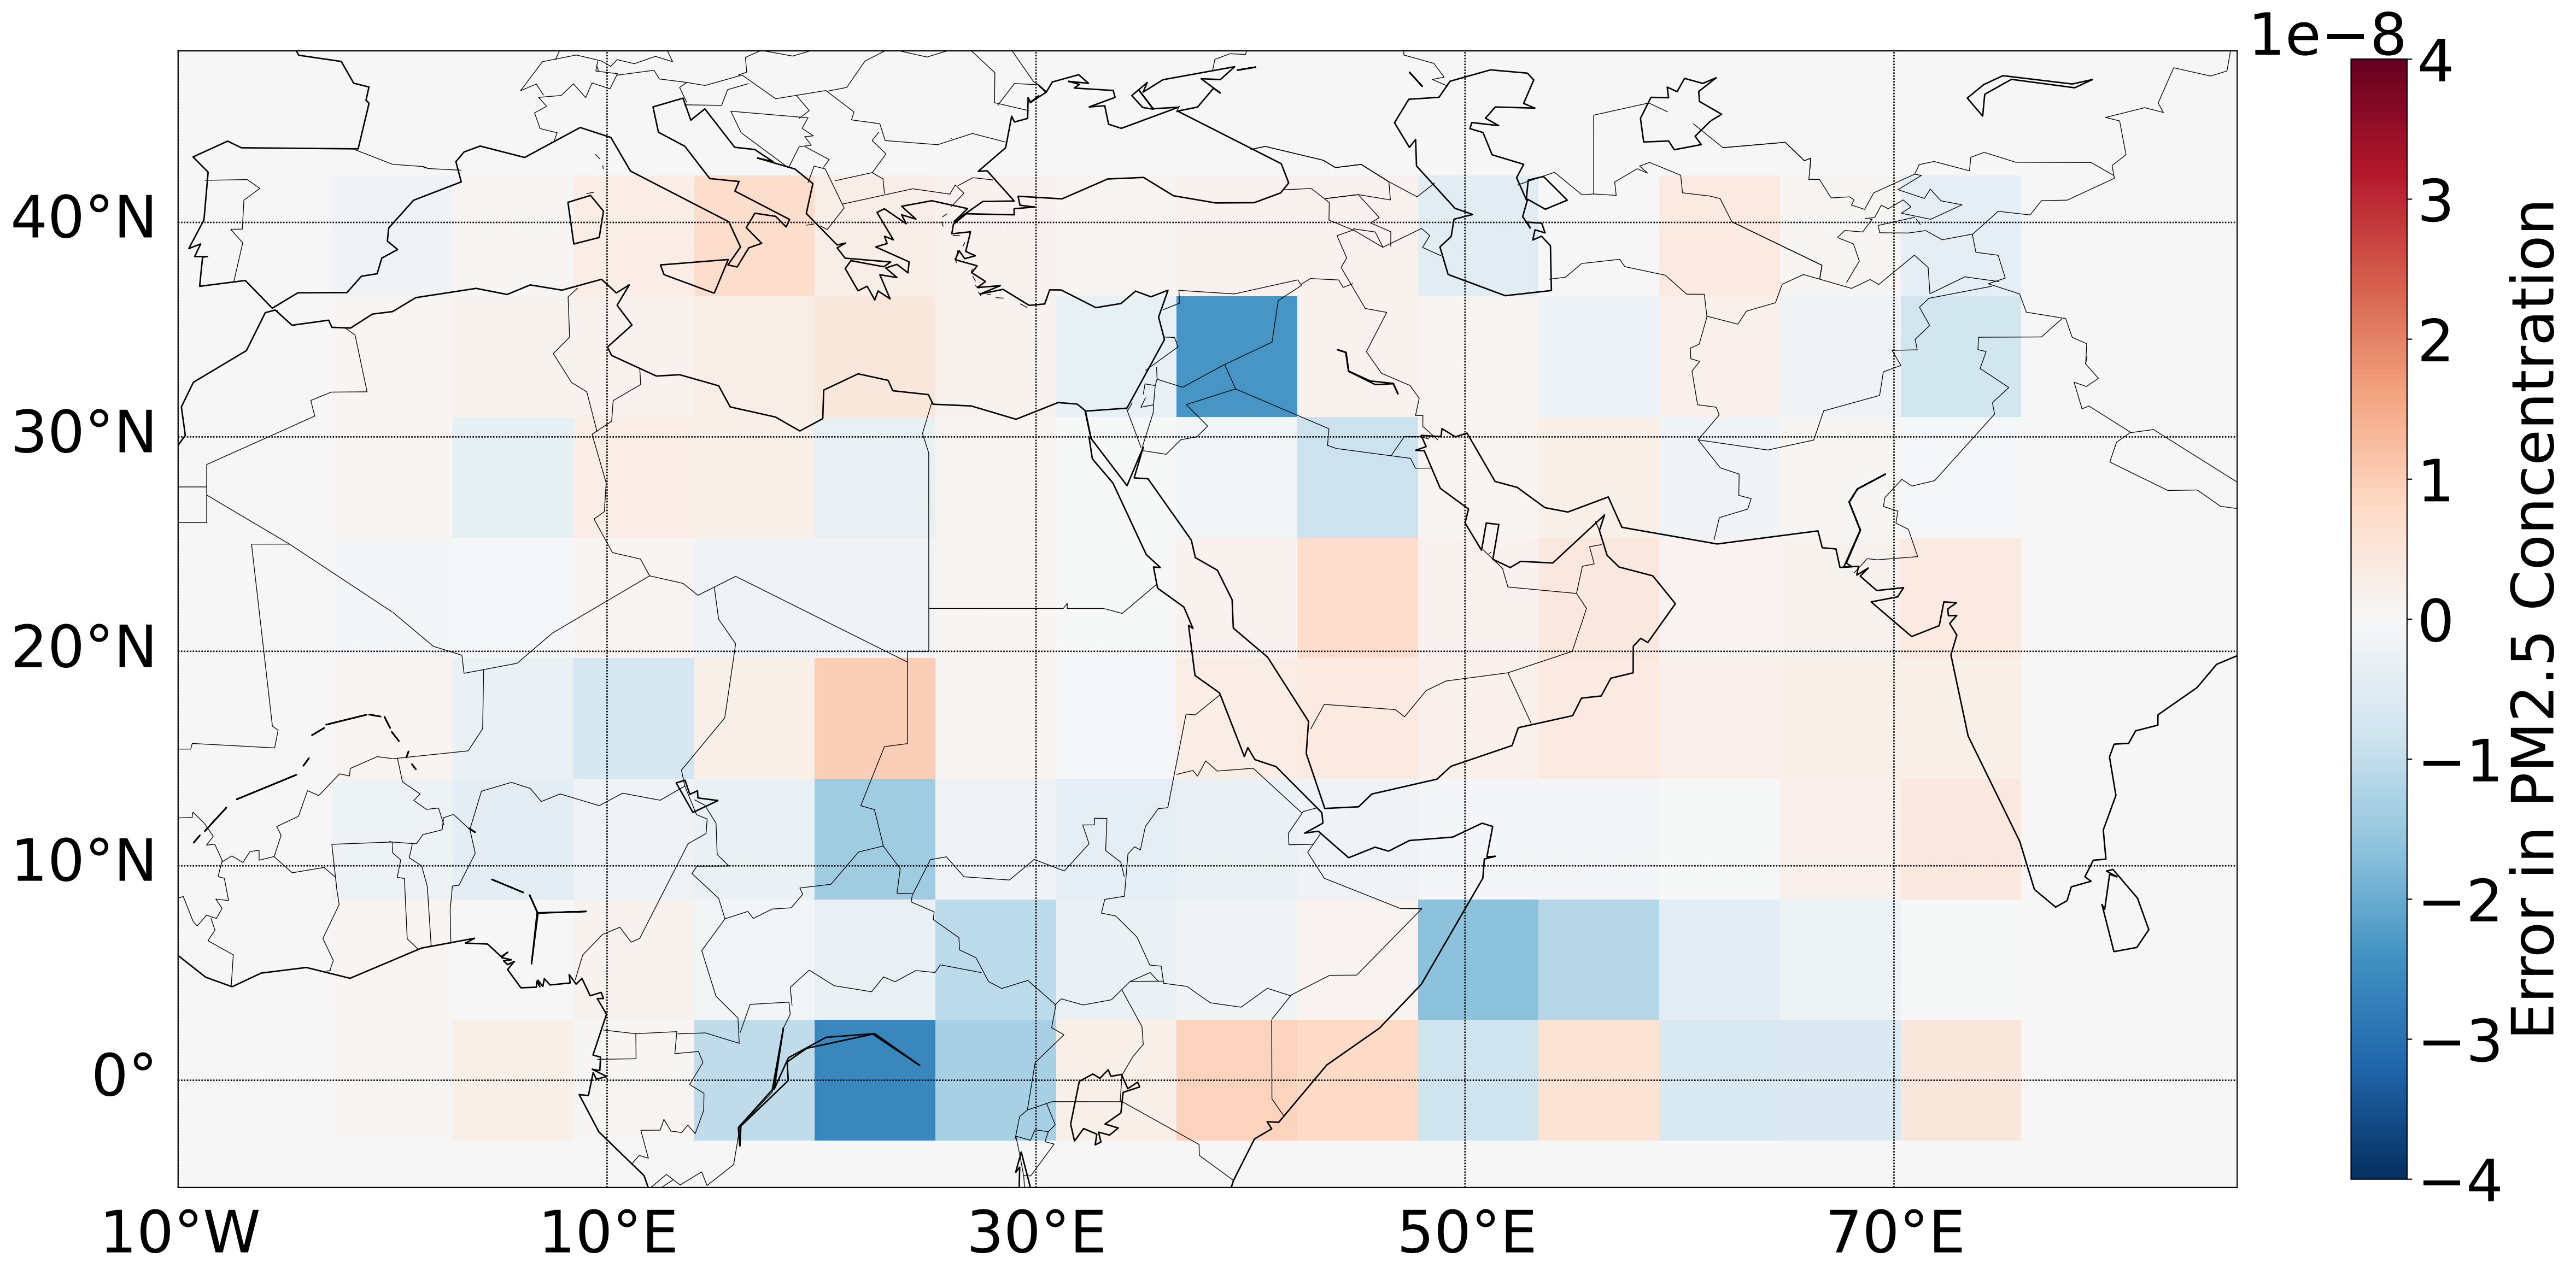

Supplement: supplementary_material [file attachment]

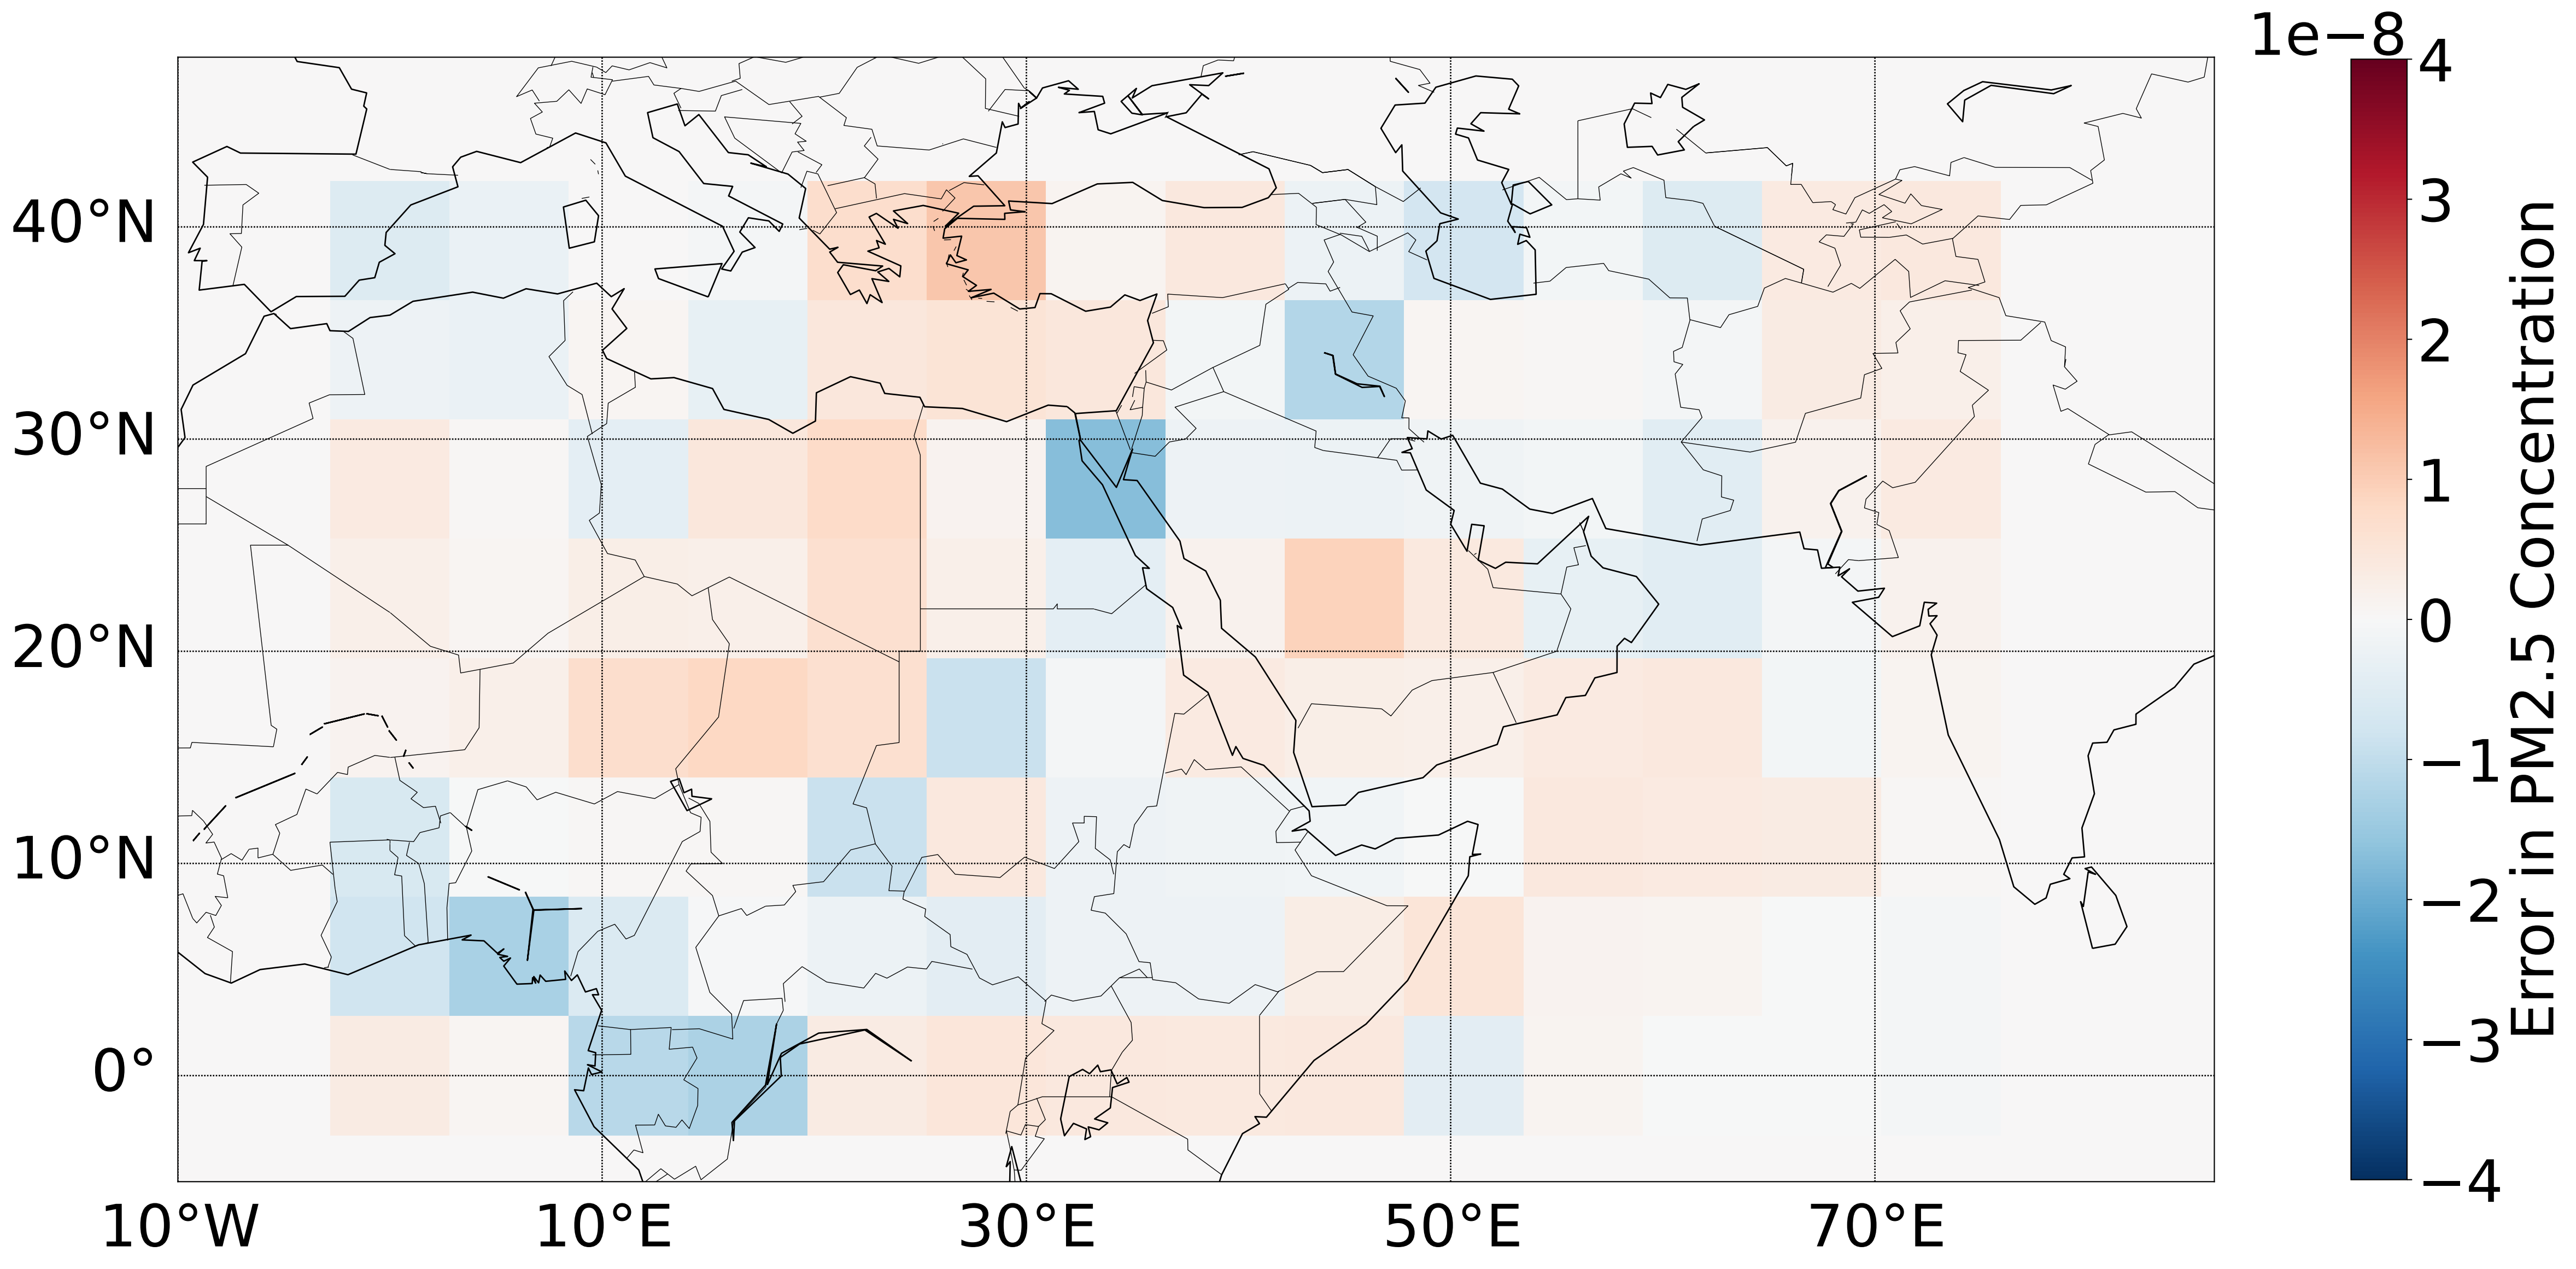

Supplement: supplementary_material [file attachment]

# pm10 distribution

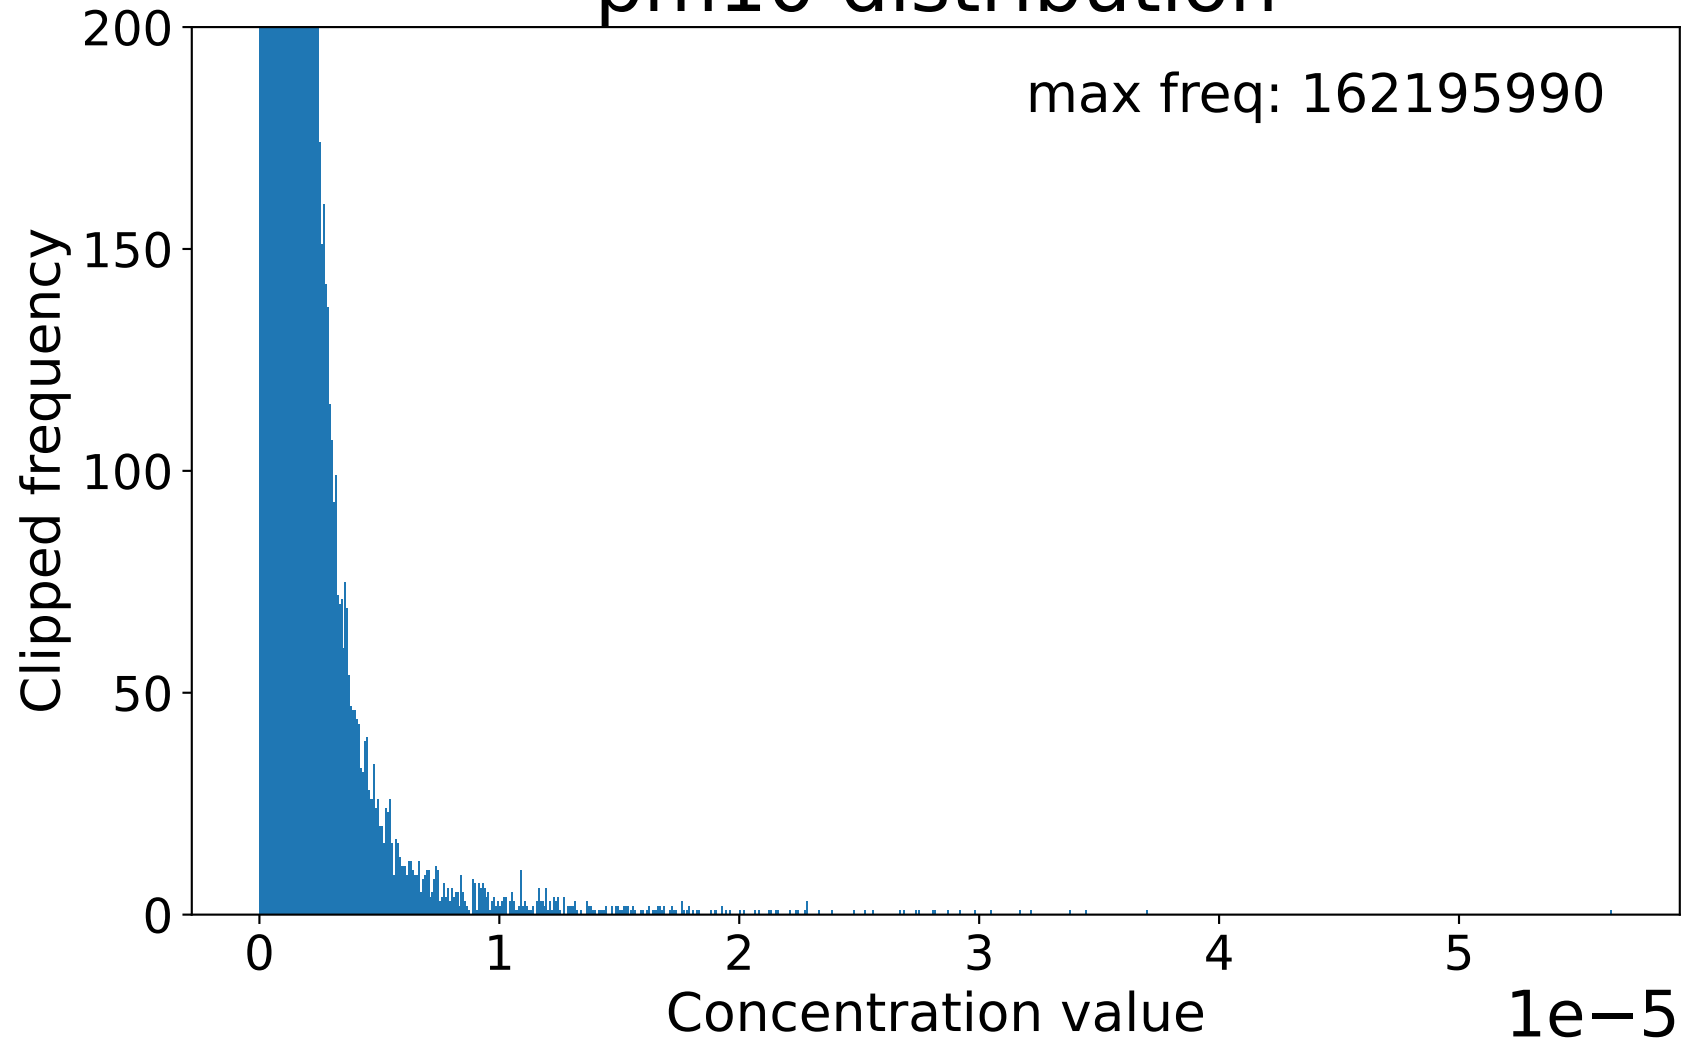

Supplement: supplementary_material [file attachment]

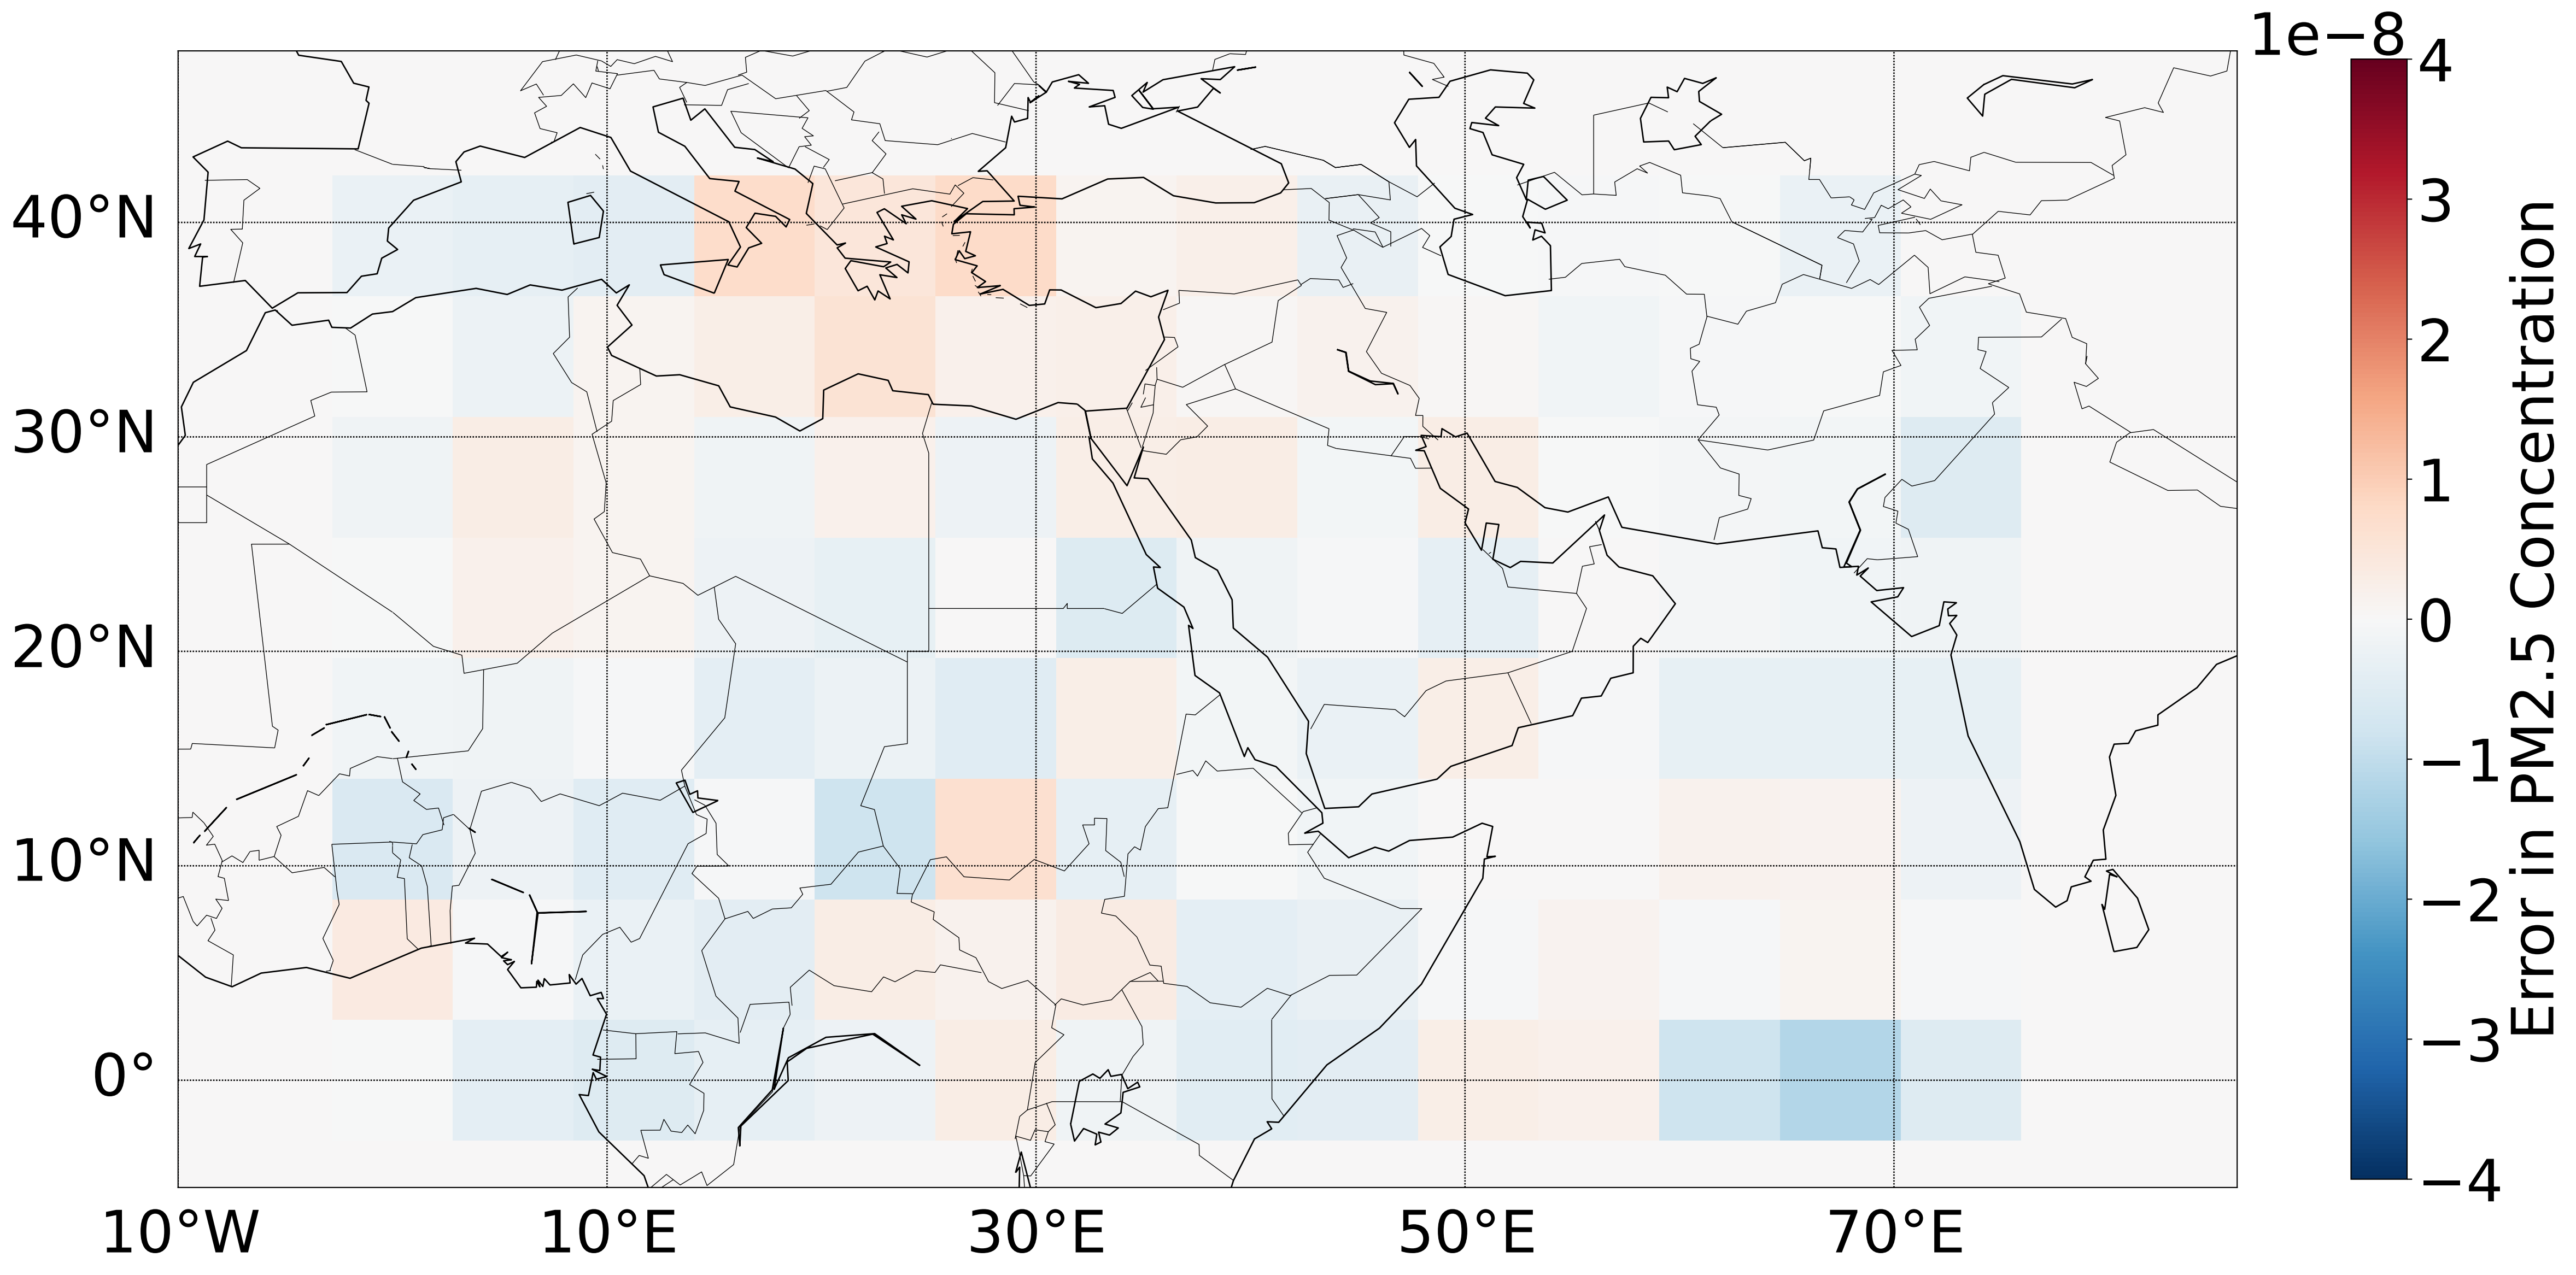

Supplement: supplementary_material [file attachment]

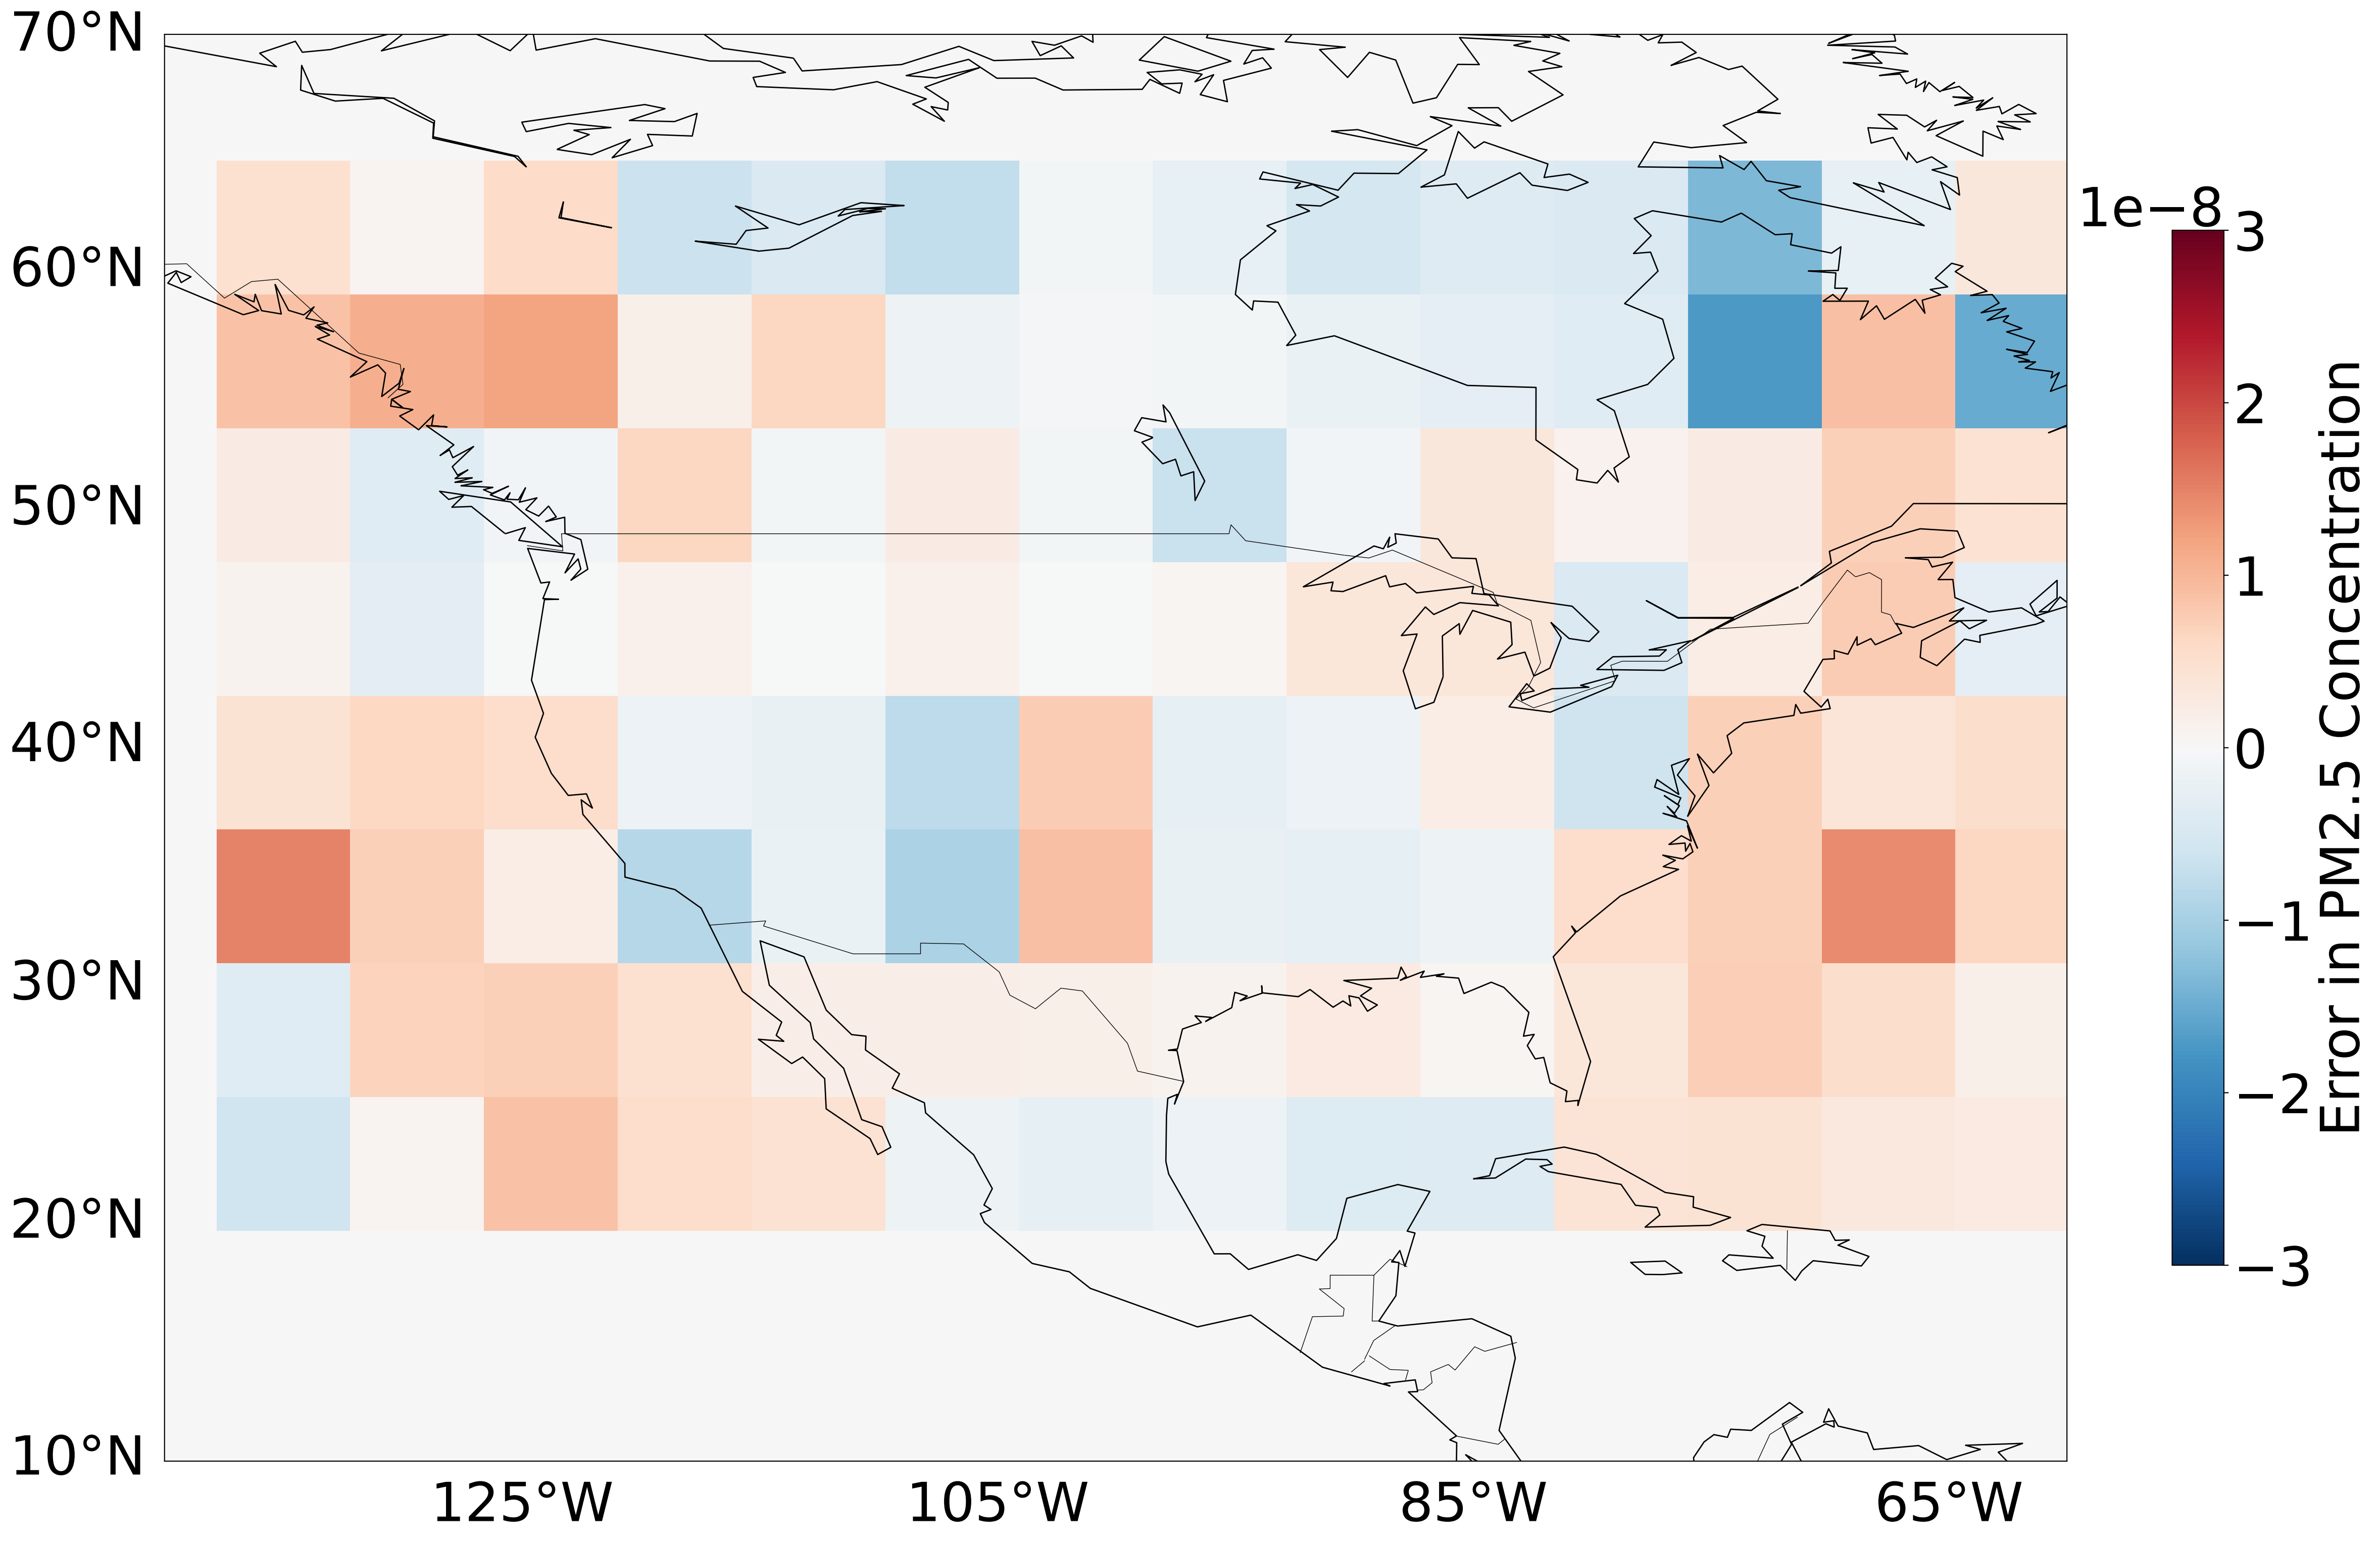

Supplement: supplementary_material [file attachment]
